# Supplementary material for: Batch effect detection and correction in RNA-seq data using machine-learning-based automated assessment of quality
Source: PubMed Central journal article supplement (PMC9284682; doi:10.1186/s12859-022-04775-y), 2022-07-14

## Supplementary material S2

From top left to bottom right: PCA Abundance, shows the uncorrected PCA of the rlog normalized counts quantified by salmon and imported to a deseq2 object, next to it in the top right panel: The PCA corrected with batch using the acPCA package to return principal components that were computed with the true batch as a confounding factor. The PCA corrected with  $P_{low}$  uses the acPCA package likewise, but  $P_{low}$  as a confounding factor. To the right of the  $P_{low}$  corrected PCA is a corrected PCA on the basis of the data without outliers. We removed outliers of base or corrected PCA, but additionally added a threshold for  $P_{low}$  depending on the distribution of  $P_{low}$  in the samples (See S1). The last two panels are the PCA corrected by the first surrogate variable of the sva-method and the PCA corrected with all surrogate variables found for this dataset.

### PCA Abundance: GSE61491

DesignBias=0.45, Gamma=0.06, Dunn1=0.03, WbRatio=0.88, DEGs=322

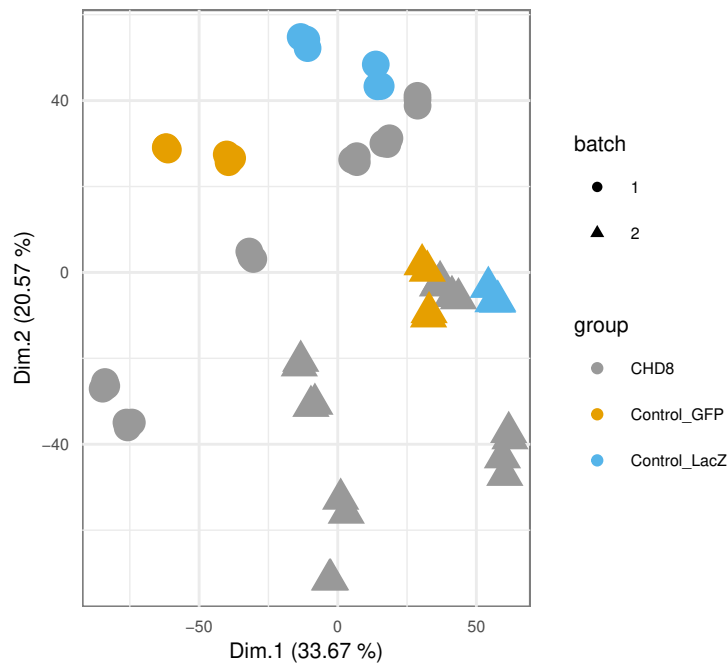

### PCA corrected Batch: GSE61491

DesignBias=0.45, Gamma=-0.01, Dunn1=0.04, WbRatio=0.88

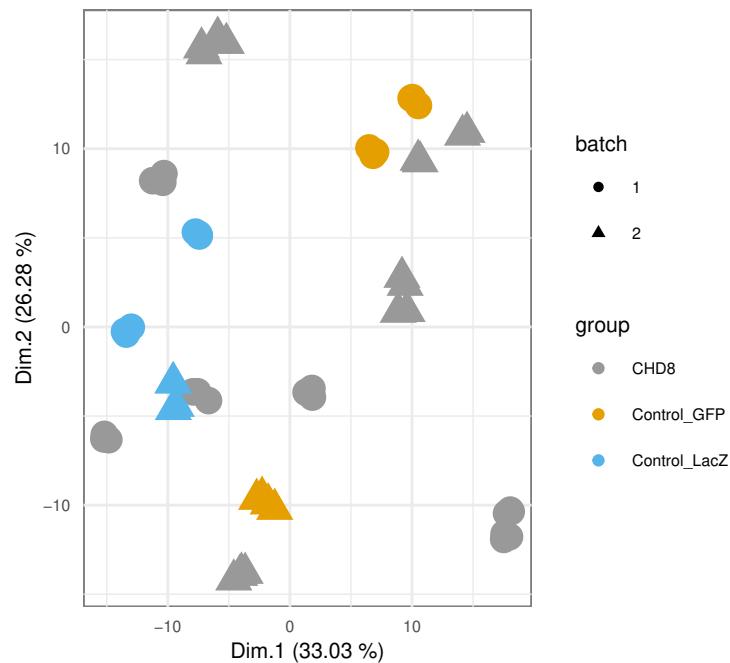

### PCA corrected Plow: GSE61491

DesignBias=0.45, Gamma=0.07, Dunn1=0.04, WbRatio=0.9

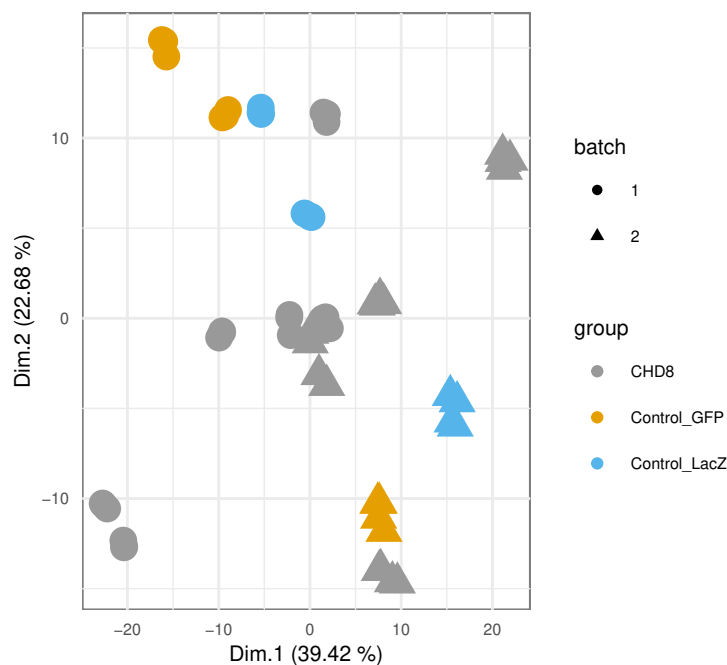

### PCA corrected Plow and no outliers: GSE61491

DesignBias=0.45, Gamma=0.08, Dunn1=0.05, WbRatio=0.9

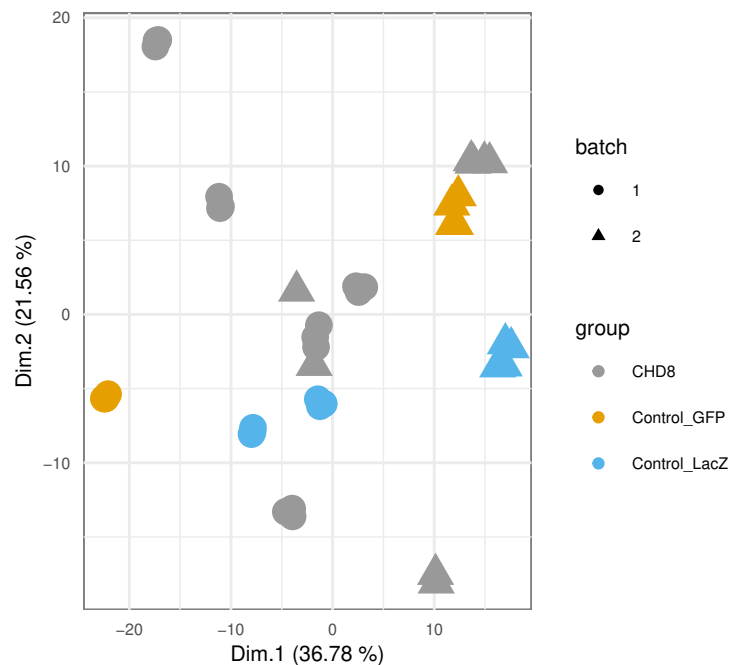

### PCA corrected SVA V1: GSE61491

DesignBias=0.45, Gamma=0.08, Dunn1=0.09, WbRatio=0.87

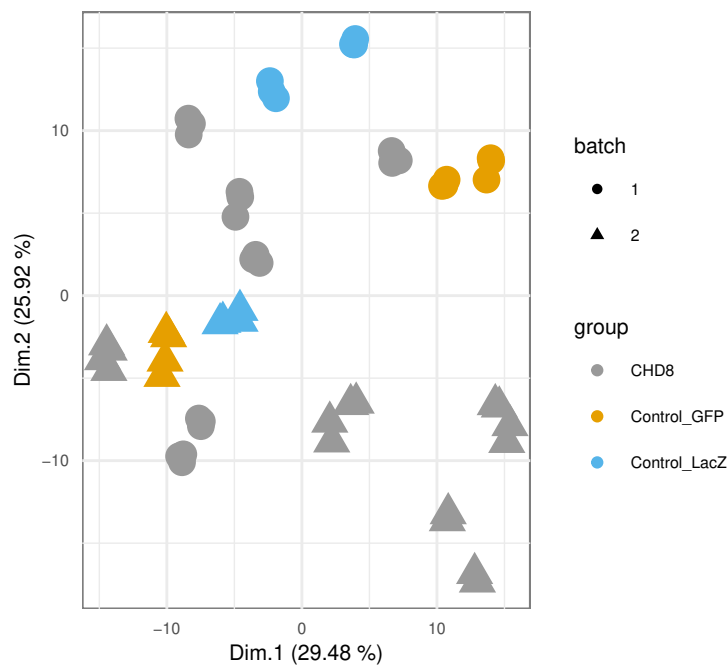

### PCA corrected SVA all surrogate vars: GSE61491

DesignBias=0.45, Gamma=0.69, Dunn1=0.04, WbRatio=0.42

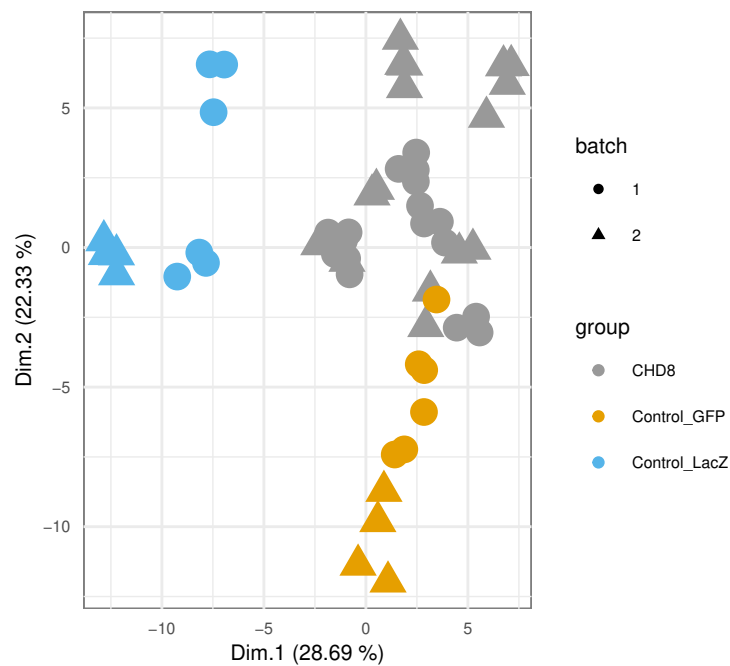

### PCA Abundance: GSE82177

DesignBias=0.49, Gamma=0.03, Dunn1=0, WbRatio=0.95, DEGs=5

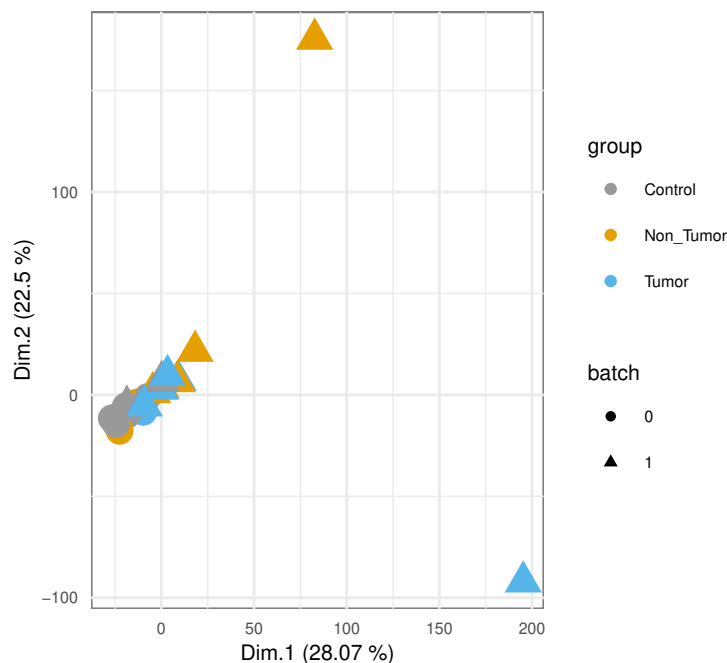

### PCA corrected Batch: GSE82177

DesignBias=0.49, Gamma=0.18, Dunn1=0.01, WbRatio=0.76

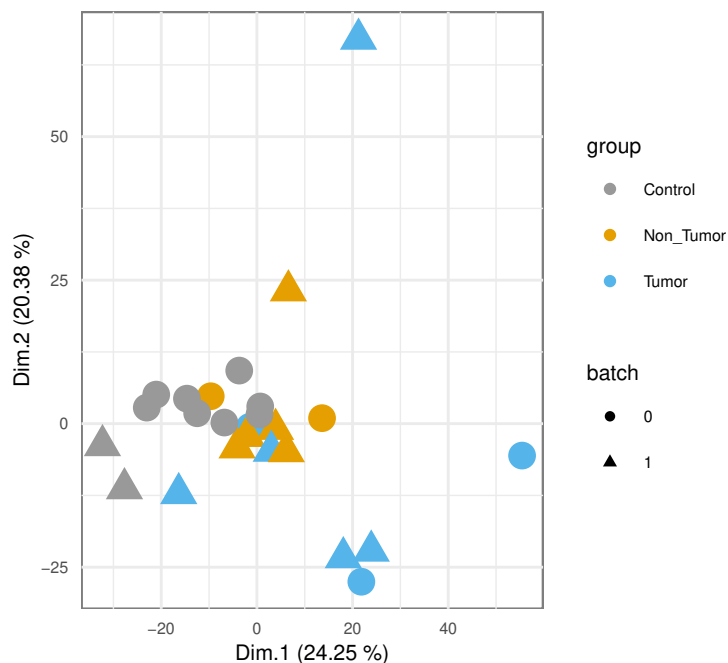

### PCA corrected Plow: GSE82177

DesignBias=0.49, Gamma=0.18, Dunn1=0.02, WbRatio=0.83

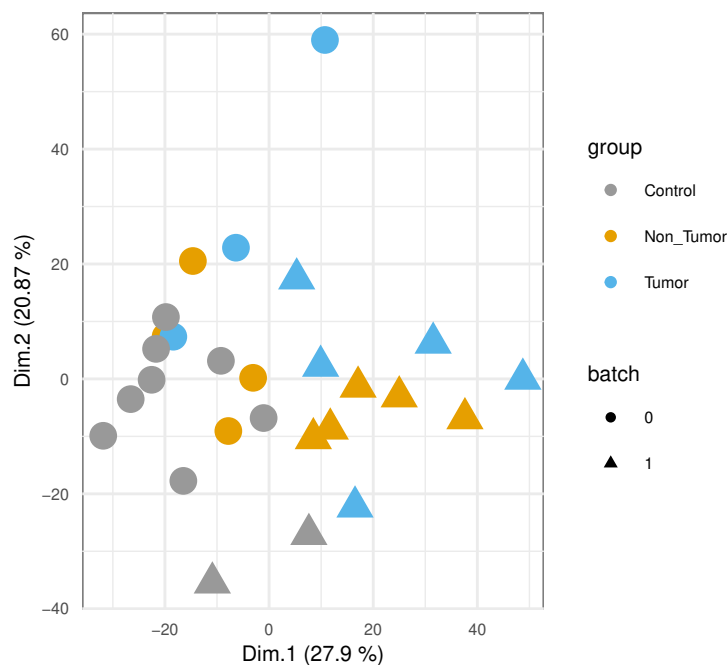

### PCA corrected Plow and no outliers: GSE82177

DesignBias=0.49, Gamma=0.23, Dunn1=0.03, WbRatio=0.79

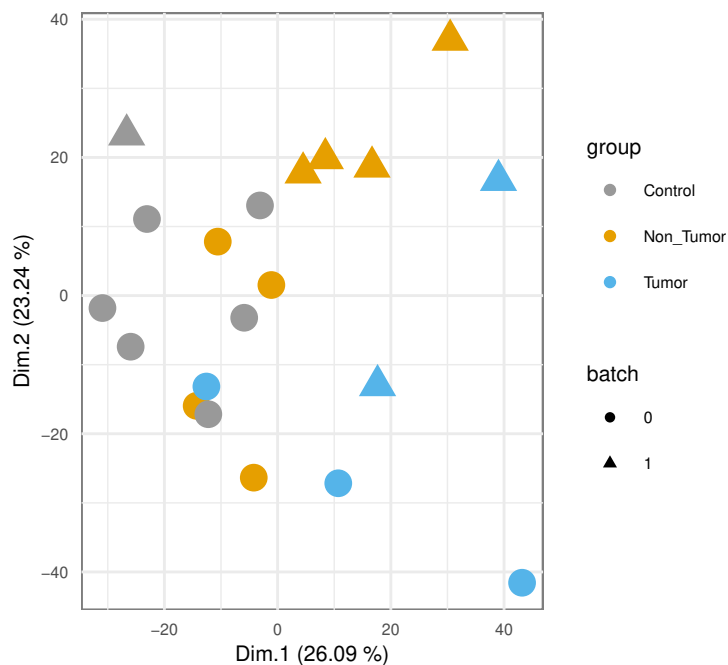

### PCA corrected SVA V1: GSE82177

DesignBias=0.49, Gamma=0.13, Dunn1=0, WbRatio=0.82

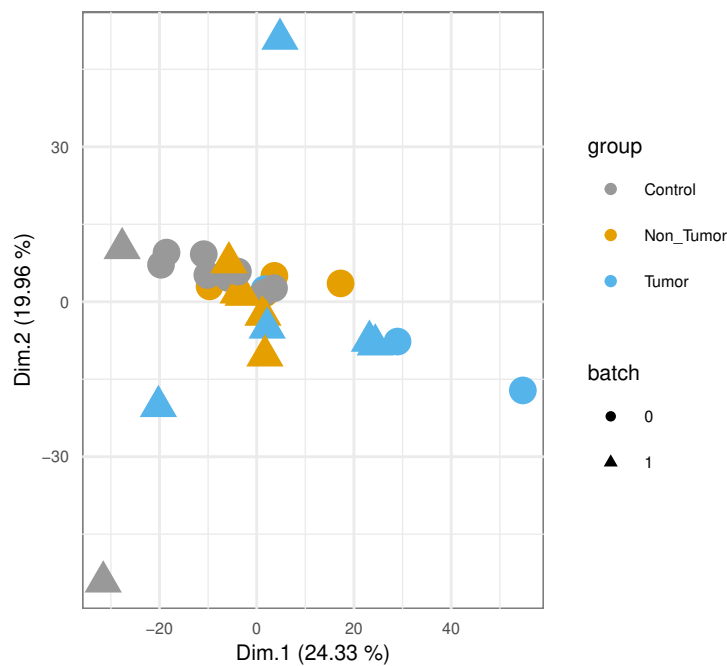

### PCA corrected SVA all surrogate vars: GSE82177

DesignBias=0.49, Gamma=0.03, Dunn1=0, WbRatio=0.94

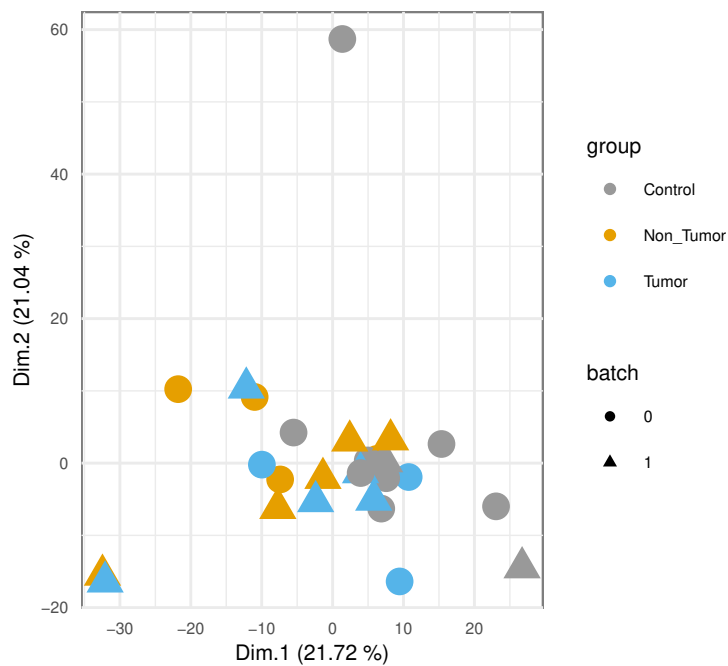

### PCA Abundance: GSE117970

DesignBias=0.62, Gamma=0.21, Dunn1=0, WbRatio=0.6, DEGs=1844

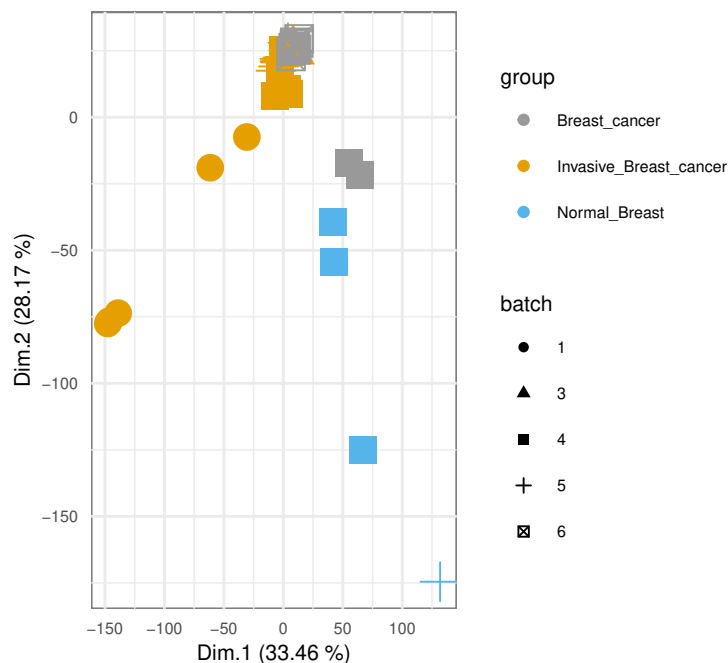

### PCA corrected Batch: GSE117970

DesignBias=0.62, Gamma=0.21, Dunn1=0.01, WbRatio=0.57

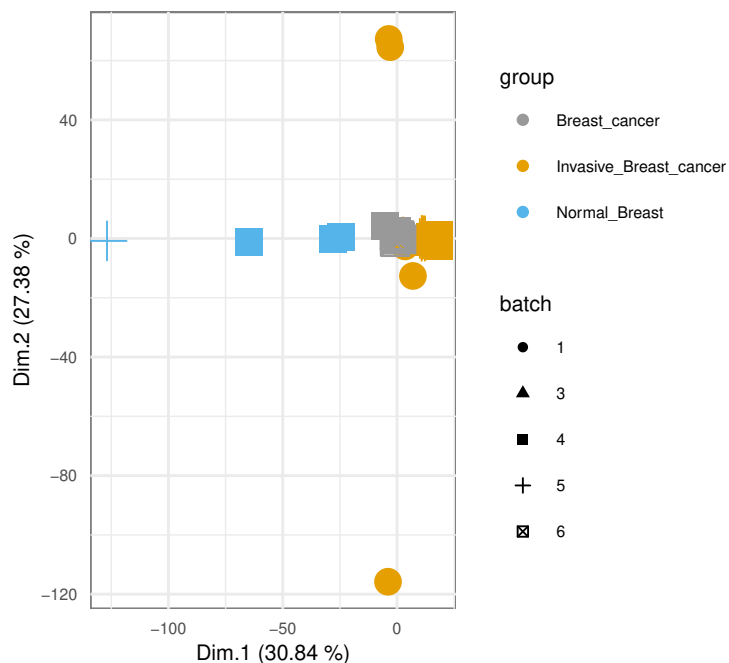

### PCA corrected Plow: GSE117970

DesignBias=0.62, Gamma=0.26, Dunn1=0.01, WbRatio=0.55

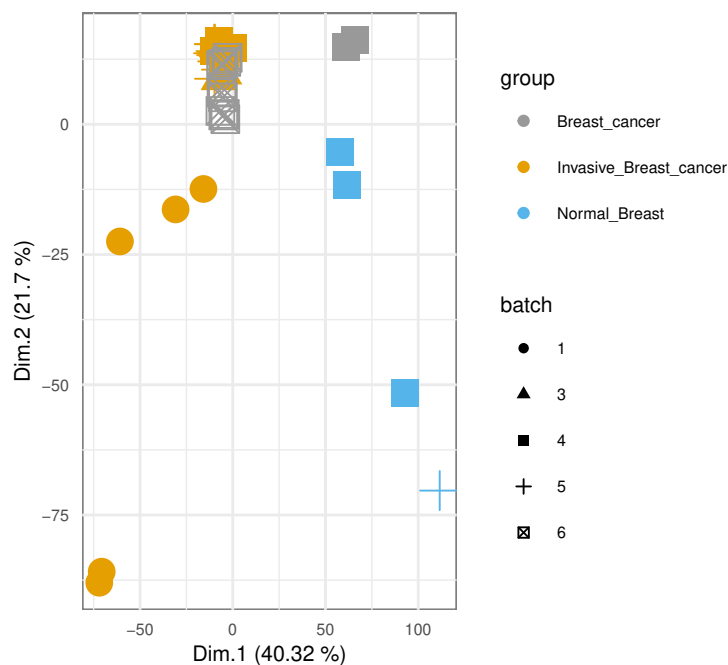

### PCA corrected Plow and no outliers: GSE117970

DesignBias=0.62, Gamma=0.25, Dunn1=0.01, WbRatio=0.59

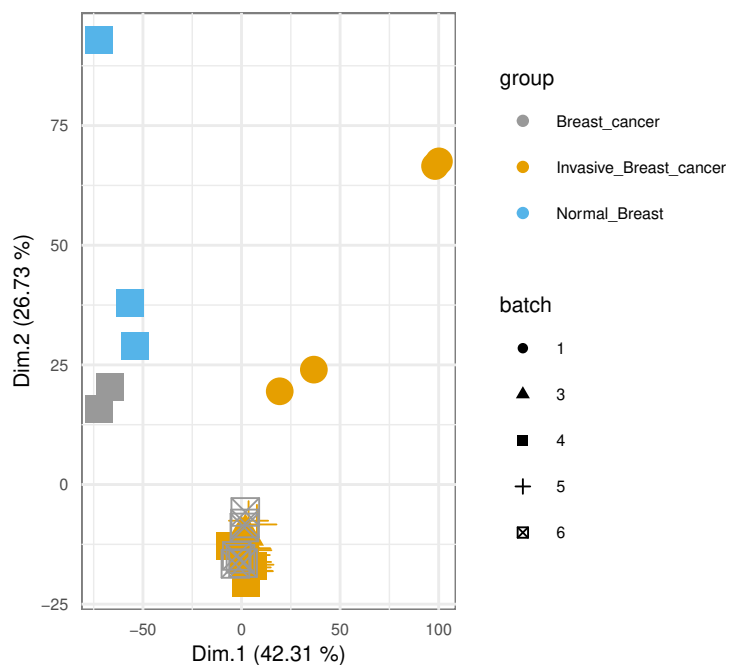

### PCA corrected SVA V1: GSE117970

DesignBias=0.62, Gamma=0.26, Dunn1=0, WbRatio=0.51

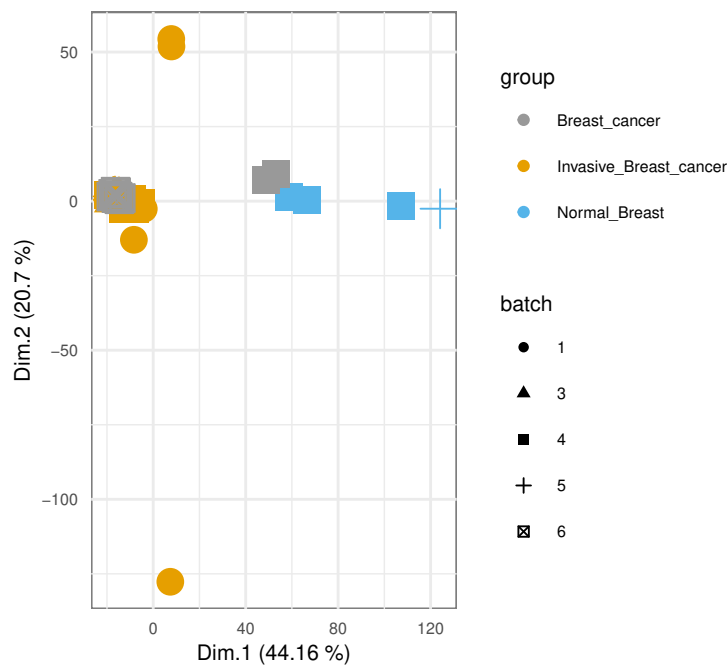

### PCA corrected SVA all surrogate vars: GSE117970

DesignBias=0.62, Gamma=0.4, Dunn1=0.02, WbRatio=0.57

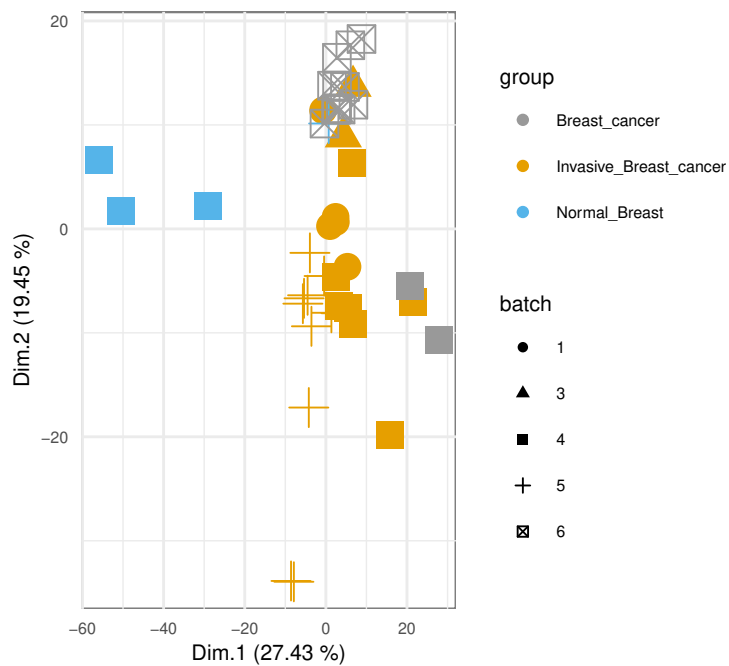

### PCA Abundance: GSE120099

DesignBias=0.66, Gamma=0.16, Dunn1=0.03, WbRatio=0.83, DEGs=721

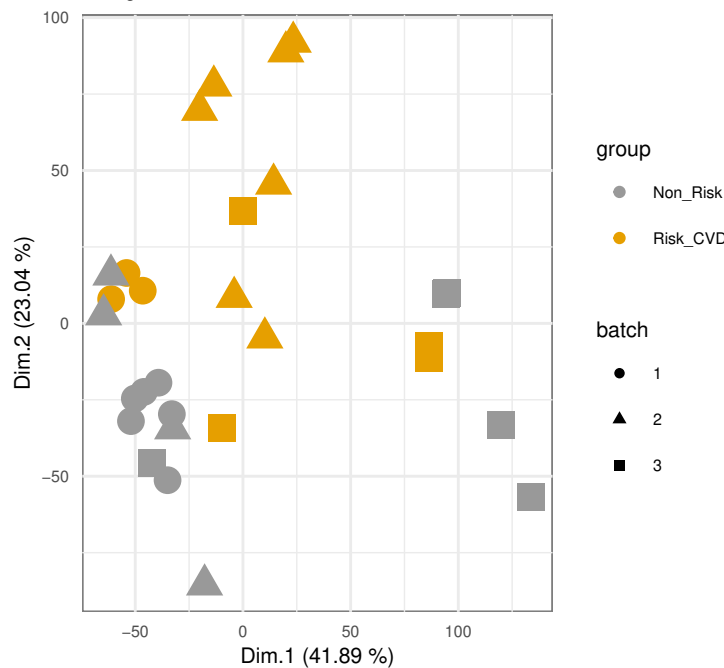

### PCA corrected Batch: GSE120099

DesignBias=0.66, Gamma=0.45, Dunn1=0.12, WbRatio=0.63

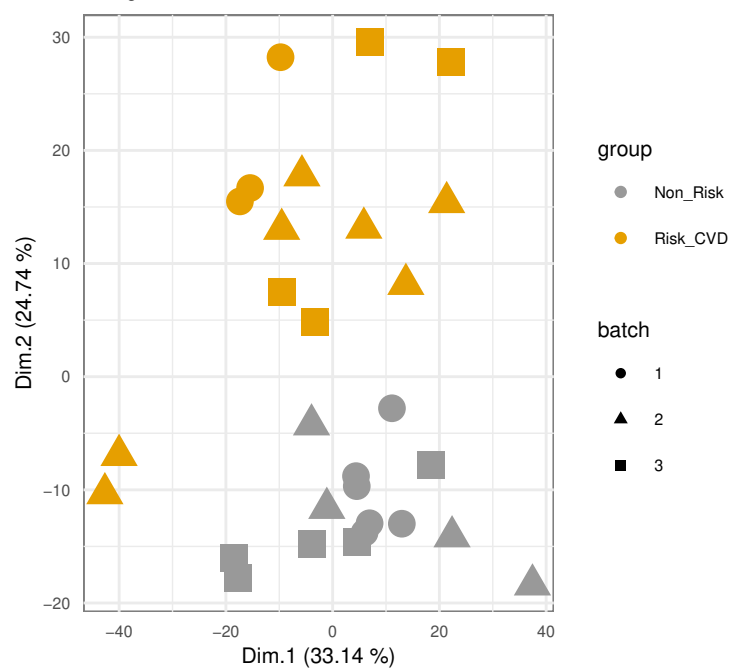

### PCA corrected Plow: GSE120099

DesignBias=0.66, Gamma=0.12, Dunn1=0.01, WbRatio=0.87

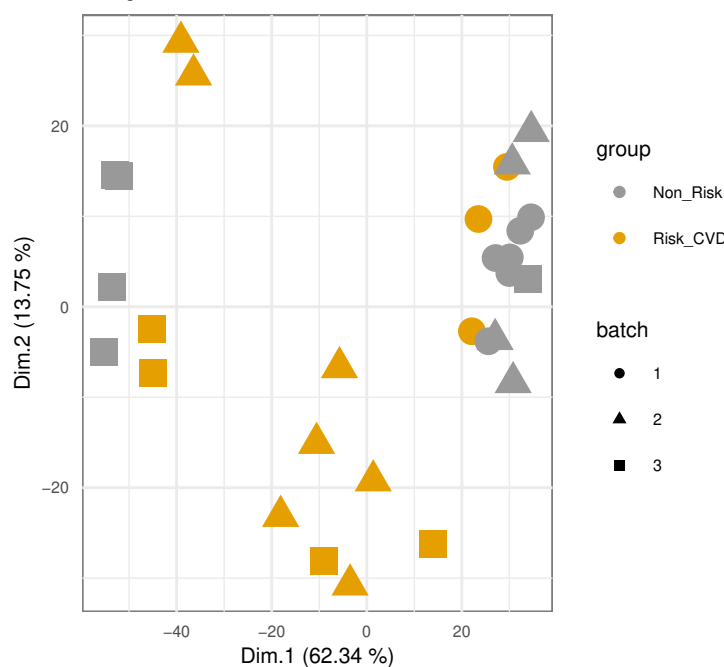

### PCA corrected Plow and no outliers: GSE120099

DesignBias=0.66, Gamma=0.12, Dunn1=0.17, WbRatio=0.87

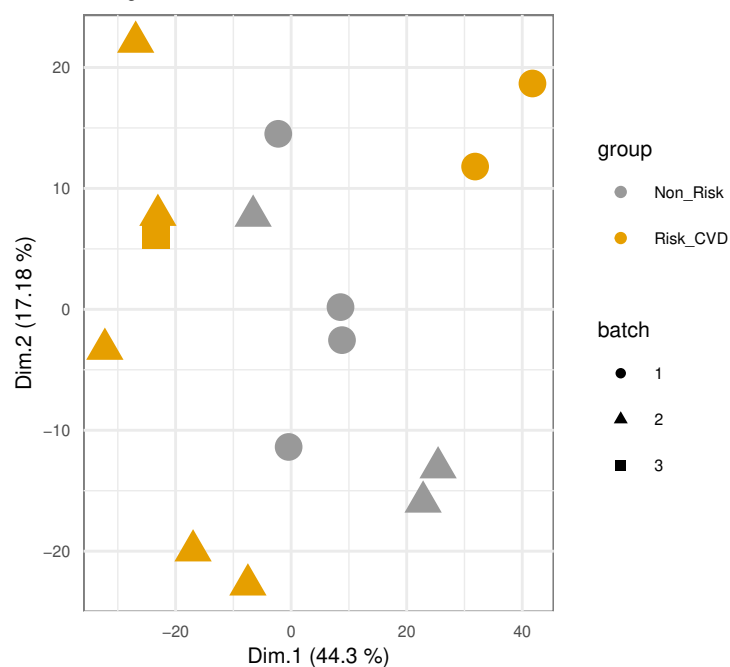

### PCA corrected SVA V1: GSE120099

DesignBias=0.66, Gamma=0.42, Dunn1=0.01, WbRatio=0.63

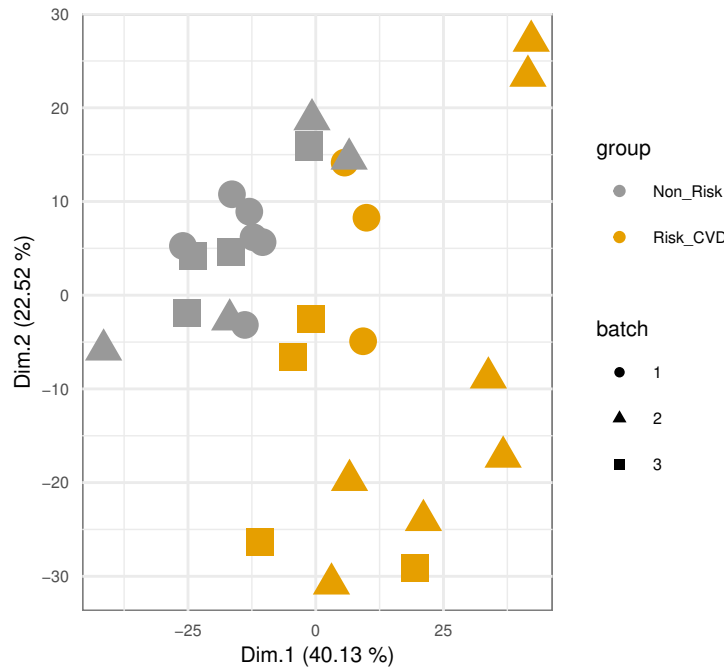

### PCA corrected SVA all surrogate vars: GSE120099

DesignBias=0.66, Gamma=0.54, Dunn1=0.22, WbRatio=0.58

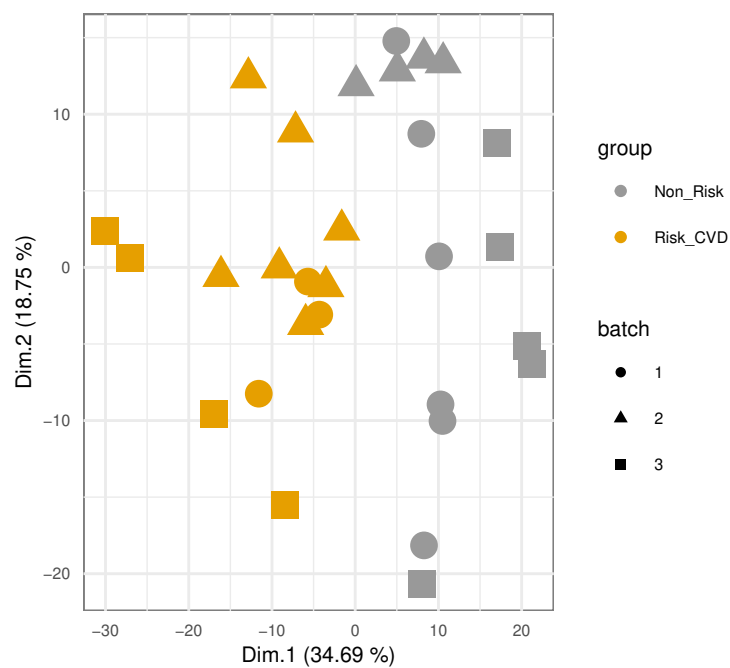

### PCA Abundance: GSE144736

DesignBias=0.49, Gamma=0.07, Dunn1=0.01, WbRatio=0.84, DEGs=10

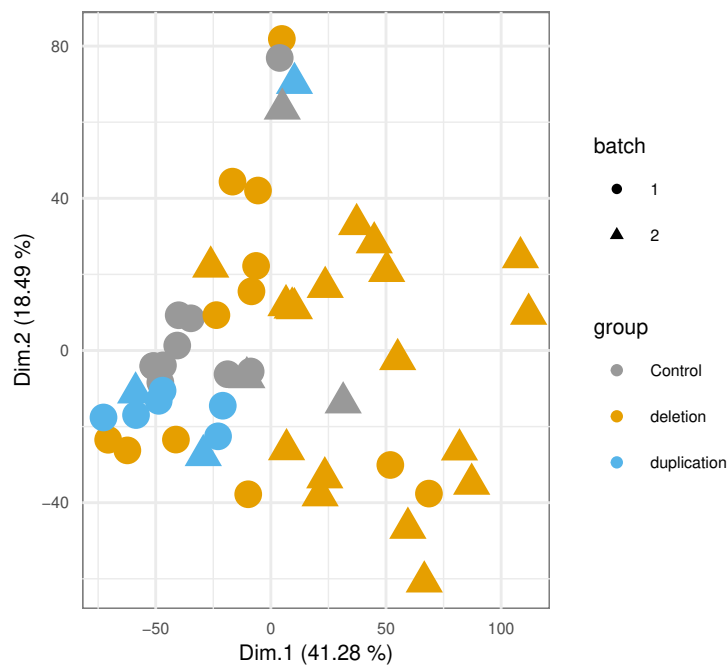

### PCA corrected Batch: GSE144736

DesignBias=0.49, Gamma=0.07, Dunn1=0.03, WbRatio=0.9

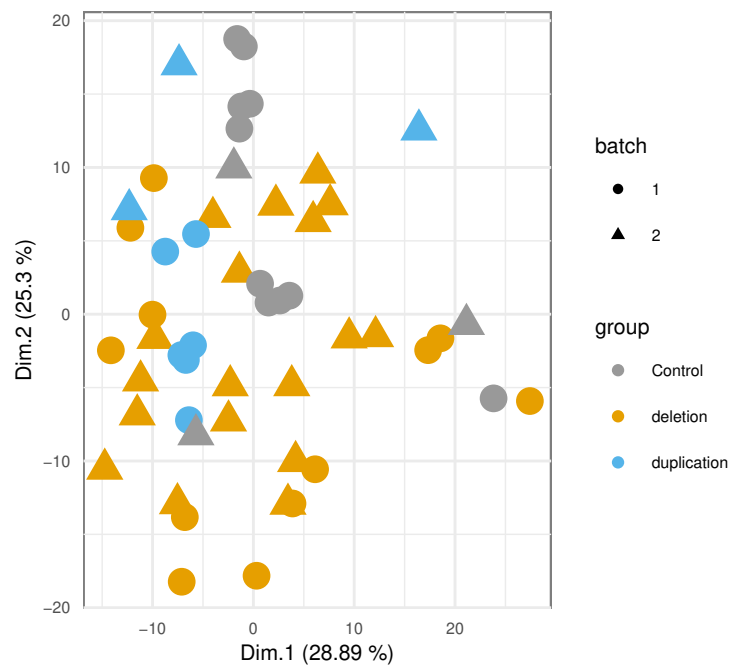

### PCA corrected Plow: GSE144736

DesignBias=0.49, Gamma=0.11, Dunn1=0.02, WbRatio=0.8

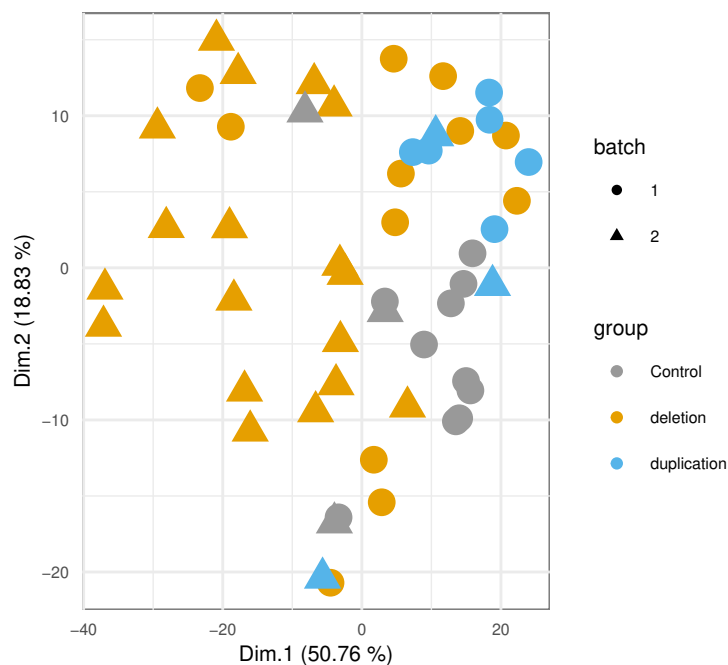

### PCA corrected Plow and no outliers: GSE144736

DesignBias=0.49, Gamma=0.16, Dunn1=0.01, WbRatio=0.74

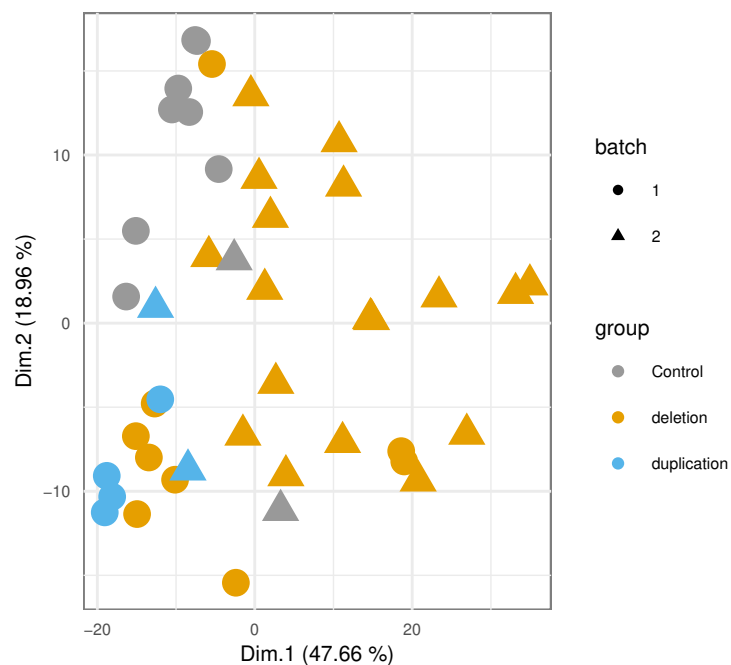

### PCA corrected SVA V1: GSE144736

DesignBias=0.49, Gamma=0.05, Dunn1=0.02, WbRatio=0.94

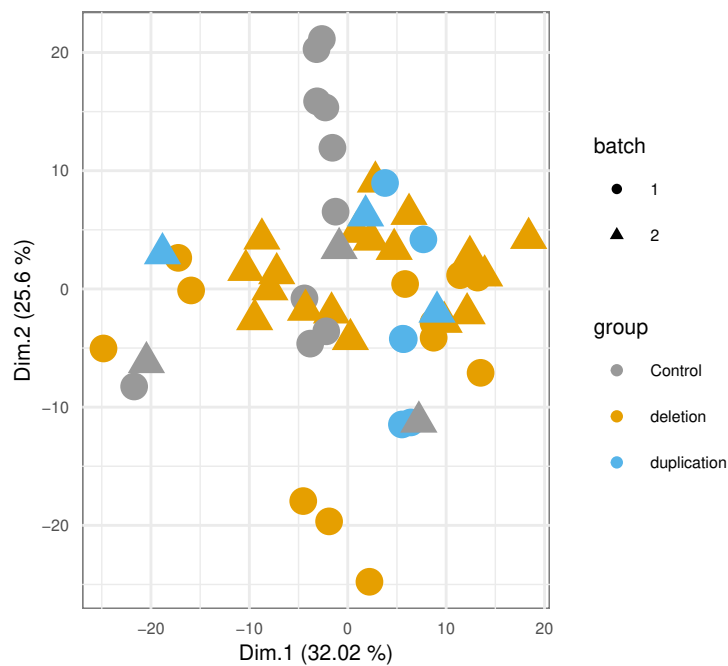

### PCA corrected SVA all surrogate vars: GSE144736

DesignBias=0.49, Gamma=0.08, Dunn1=0.02, WbRatio=0.87

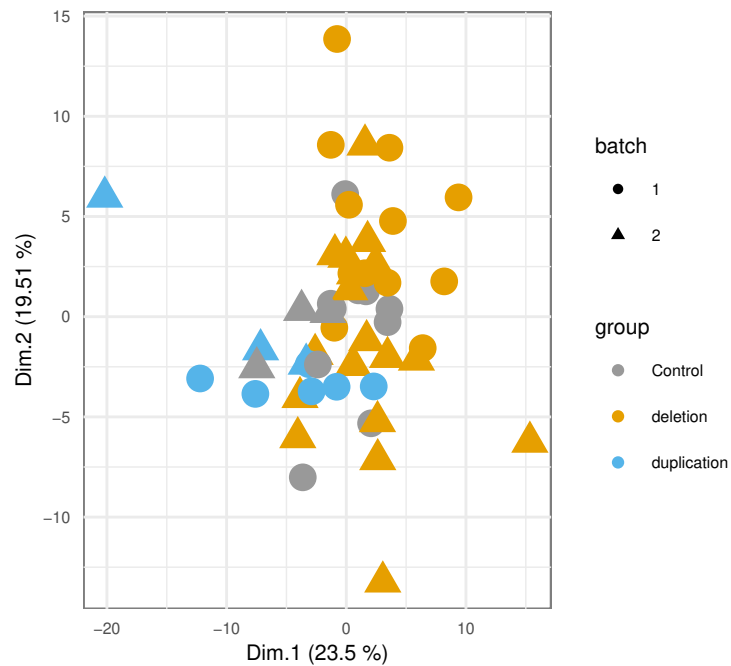

### PCA Abundance: GSE153380

DesignBias=0.44, Gamma=0.3, Dunn1=0.16, WbRatio=0.64, DEGs=398

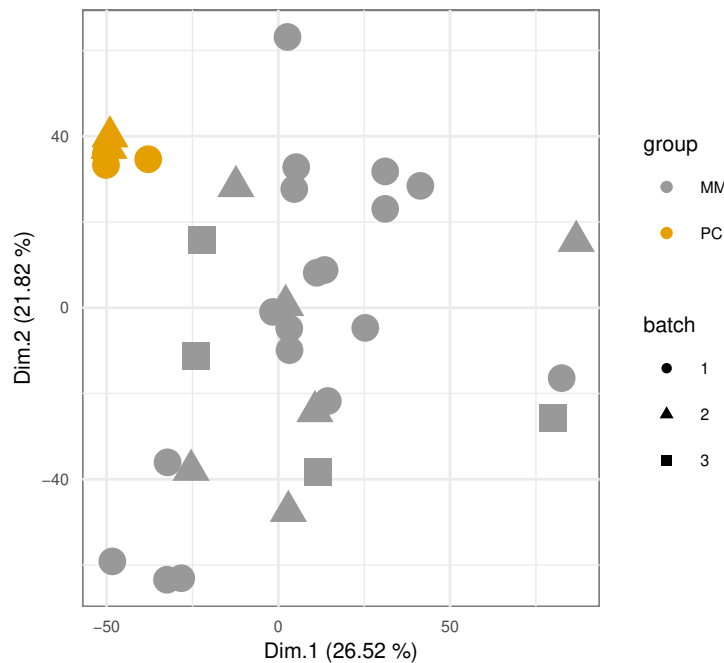

### PCA corrected Batch: GSE153380

DesignBias=0.44, Gamma=0.69, Dunn1=0.44, WbRatio=0.41

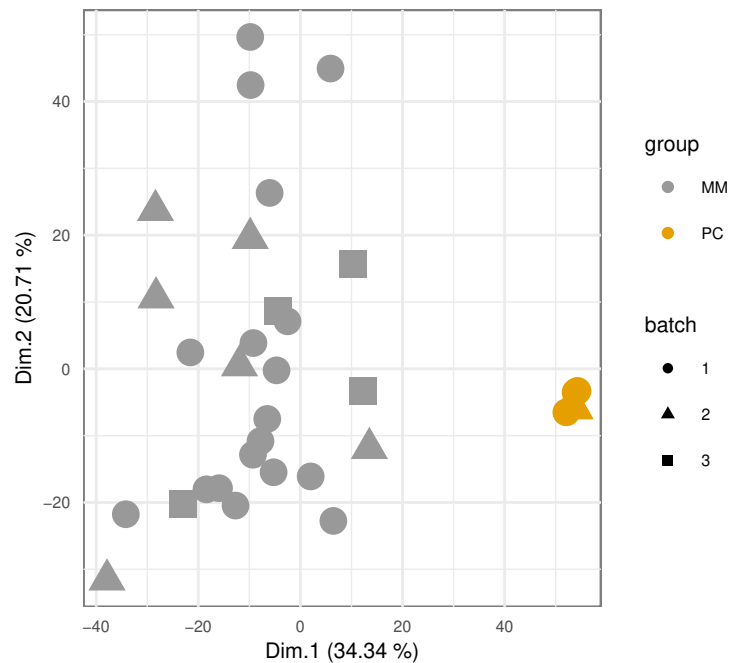

### PCA corrected Plow: GSE153380

DesignBias=0.44, Gamma=0.75, Dunn1=0.4, WbRatio=0.37

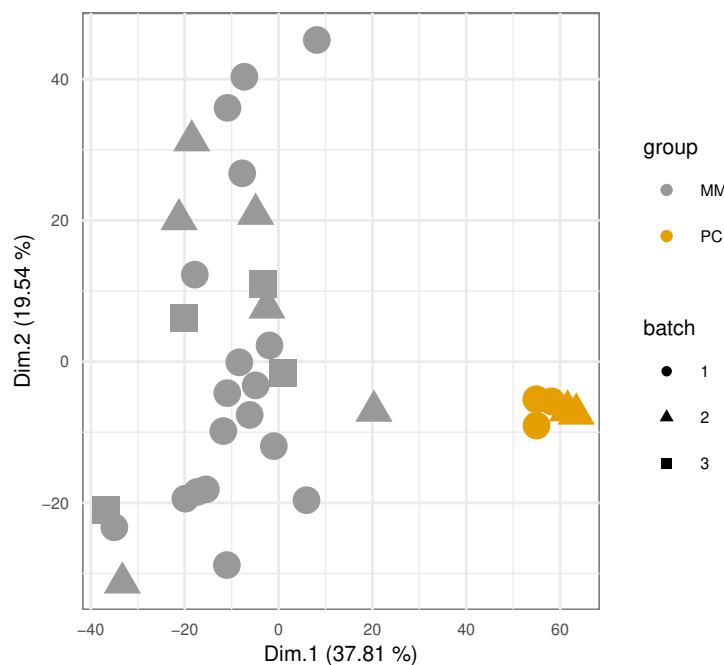

### PCA corrected Plow and no outliers: GSE153380

DesignBias=0.44, Gamma=0.67, Dunn1=0.52, WbRatio=0.42

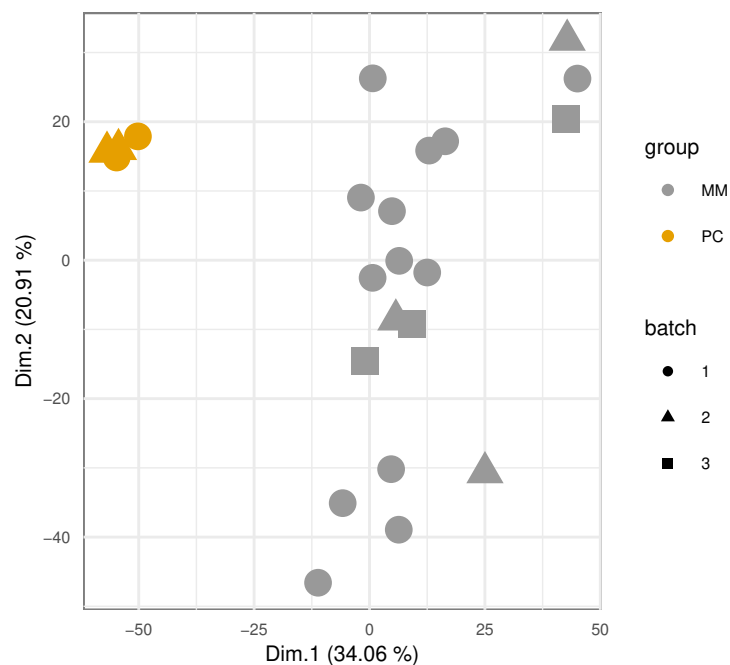

### PCA corrected SVA V1: GSE153380

DesignBias=0.44, Gamma=-0.22, Dunn1=0.02, WbRatio=1.18

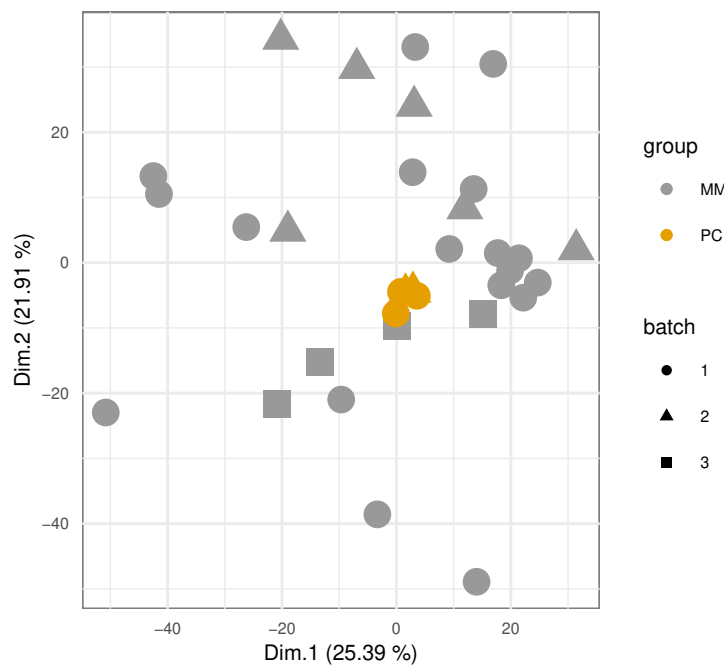

### PCA corrected SVA all surrogate vars: GSE153380

DesignBias=0.44, Gamma=-0.18, Dunn1=0.03, WbRatio=1.2

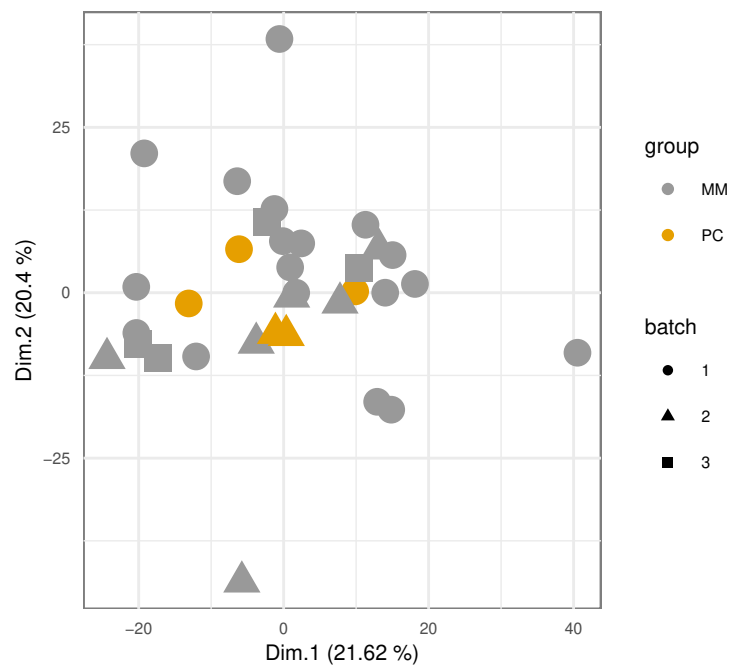

### PCA Abundance: GSE162760

DesignBias=0.5, Gamma=0.01, Dunn1=0.01, WbRatio=0.97, DEGs=223

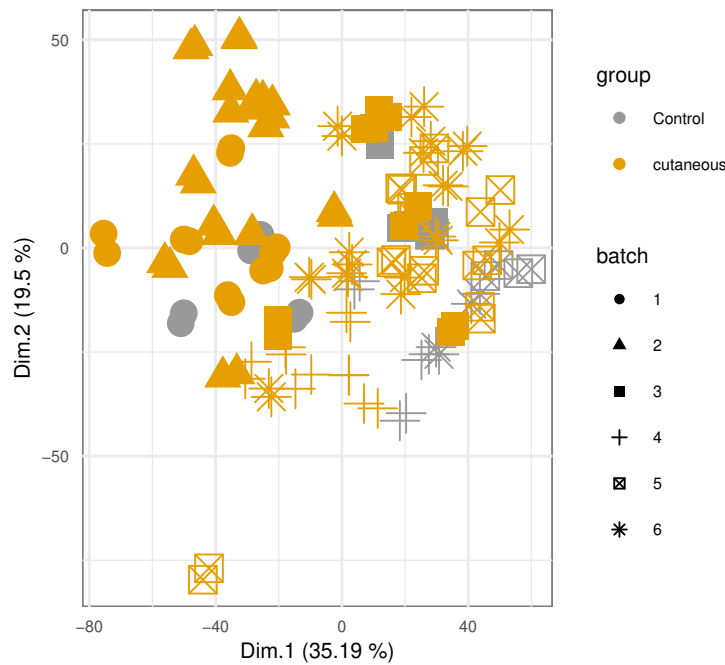

### PCA corrected Batch: GSE162760

DesignBias=0.5, Gamma=0.02, Dunn1=0, WbRatio=0.94

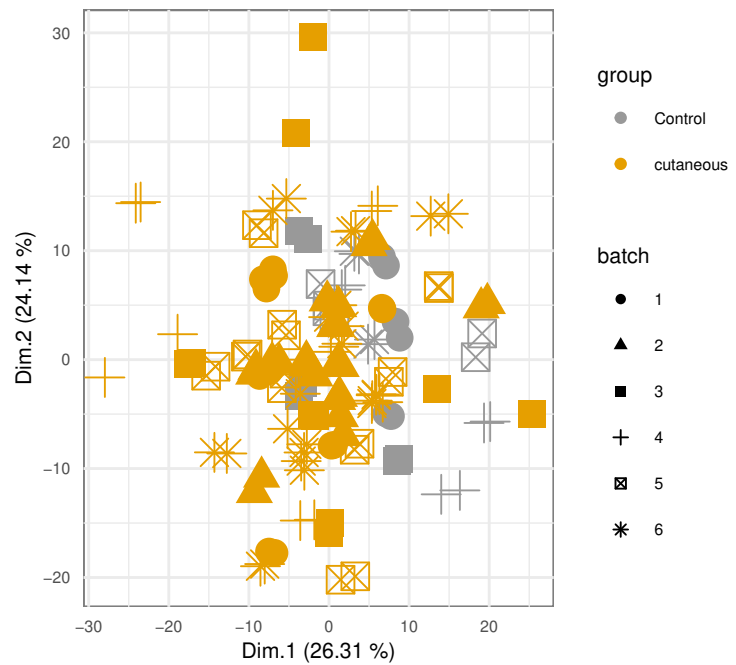

### PCA corrected Plow: GSE162760

DesignBias=0.5, Gamma=0.01, Dunn1=0.01, WbRatio=0.97

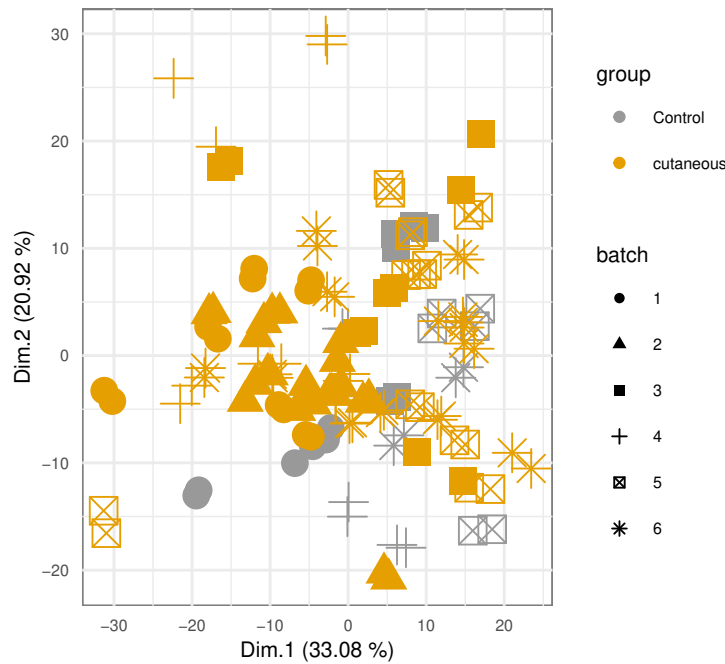

### PCA corrected Plow and no outliers: GSE162760

DesignBias=0.5, Gamma=0.05, Dunn1=0, WbRatio=0.92

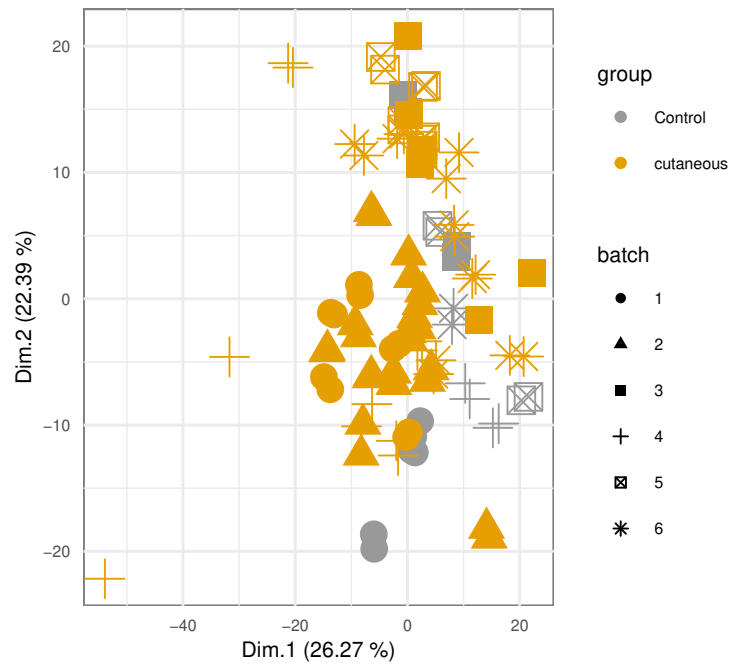

### PCA corrected SVA V1: GSE162760

DesignBias=0.5, Gamma=0.02, Dunn1=0, WbRatio=0.94

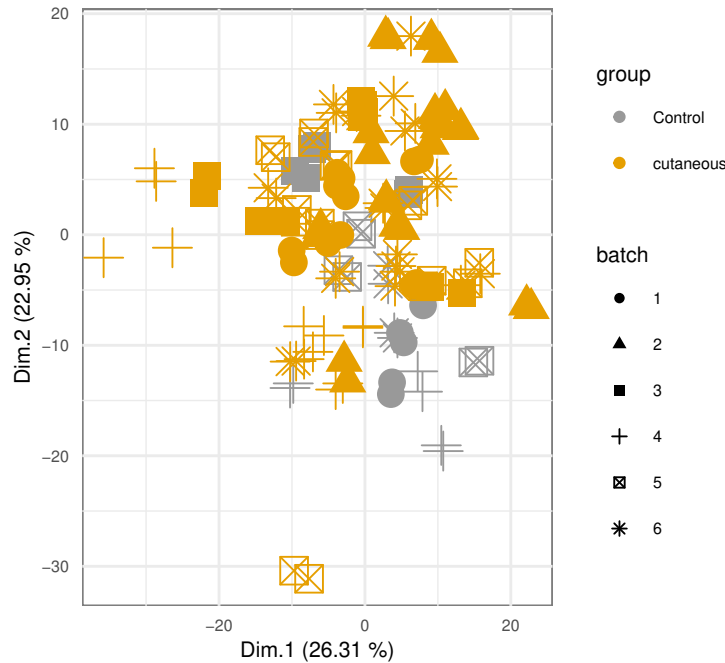

### PCA corrected SVA all surrogate vars: GSE162760

DesignBias=0.5, Gamma=-0.03, Dunn1=0, WbRatio=1.09

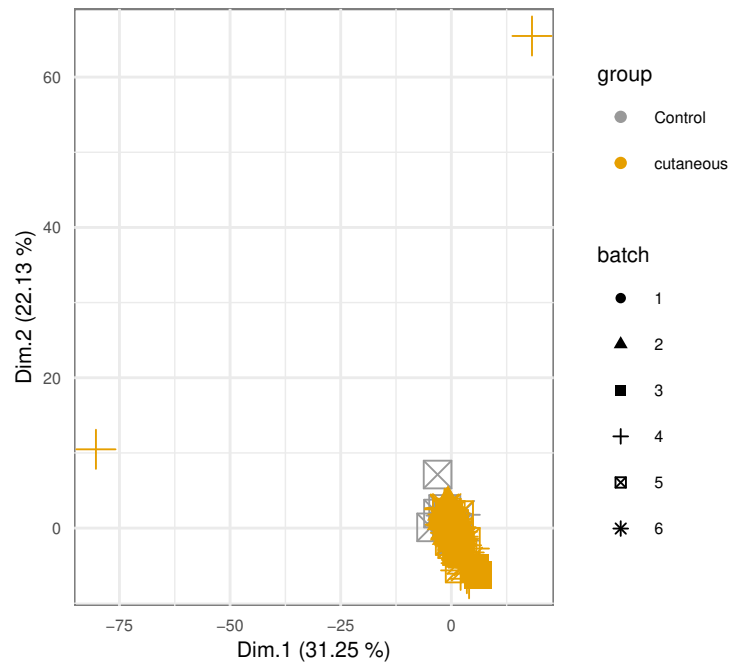



### PCA Abundance: GSE163214

DesignBias=0.46, Gamma=0.09, Dunn1=0.02, WbRatio=0.91, DEGs=3

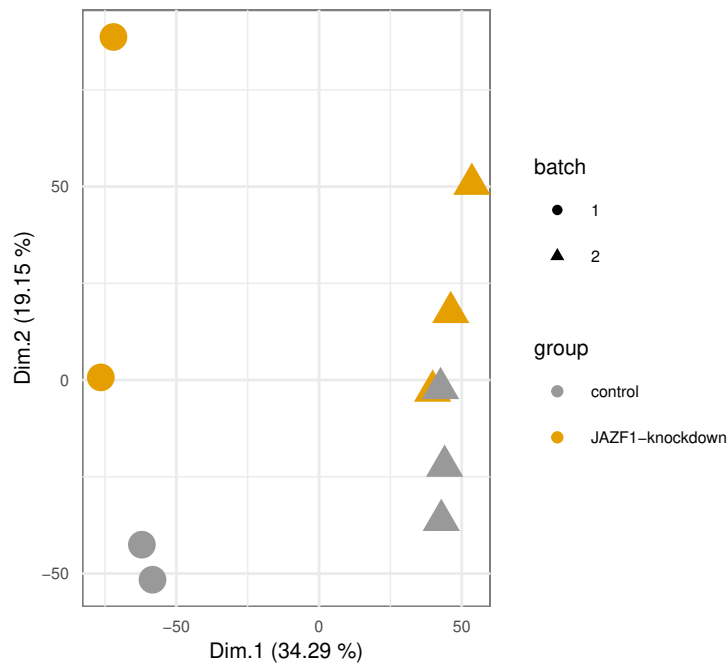

### PCA corrected Batch: GSE163214

DesignBias=0.46, Gamma=0.33, Dunn1=0.21, WbRatio=0.7

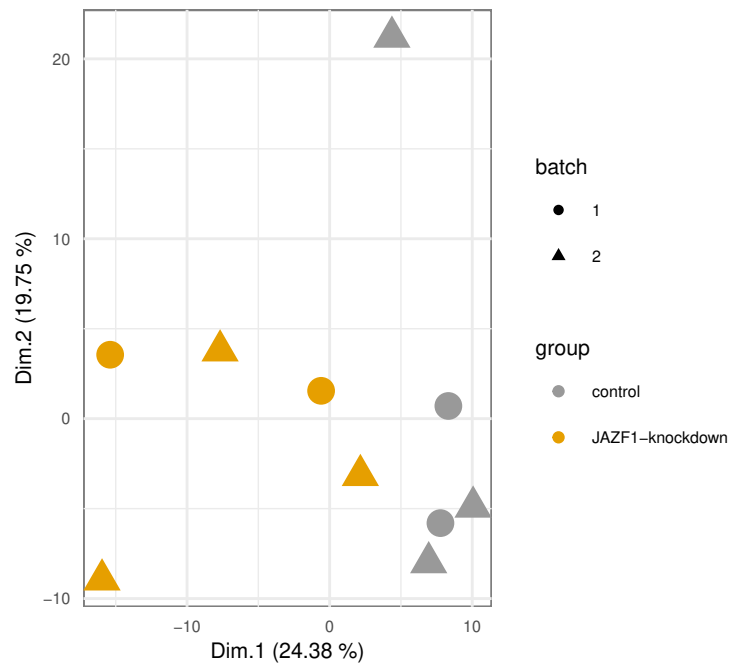

### PCA corrected Plow: GSE163214

DesignBias=0.46, Gamma=0.3, Dunn1=0.14, WbRatio=0.74

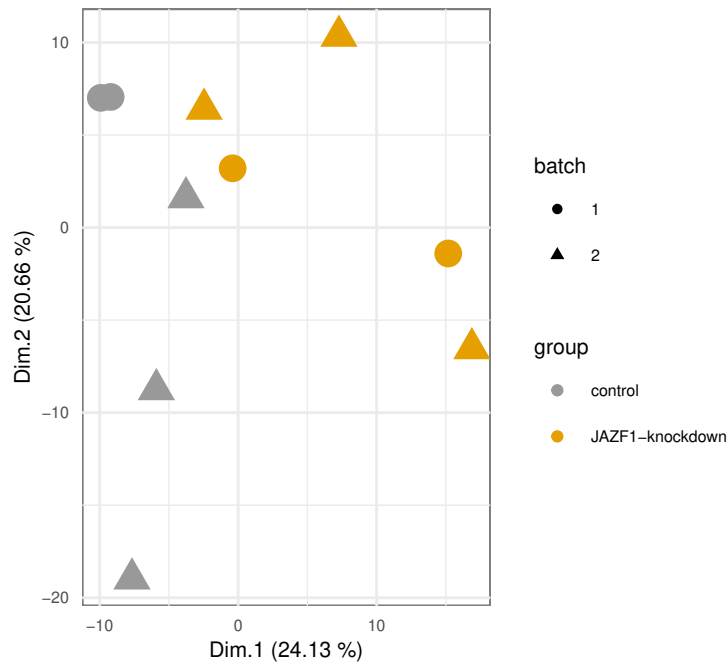

### PCA corrected Plow and no outliers: GSE163214

DesignBias=0.46, Gamma=0.35, Dunn1=0.23, WbRatio=0.73

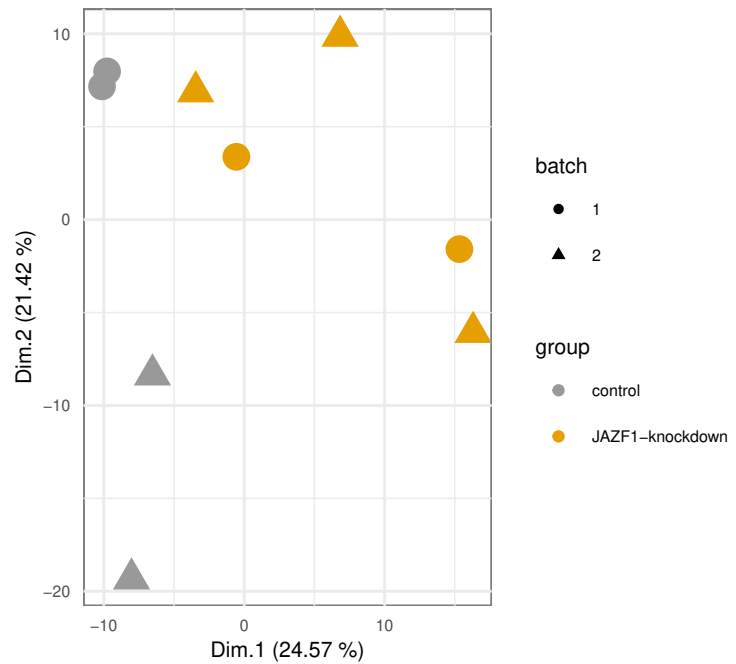

### PCA corrected SVA V1: GSE163214

DesignBias=0.46, Gamma=0.33, Dunn1=0.18, WbRatio=0.7

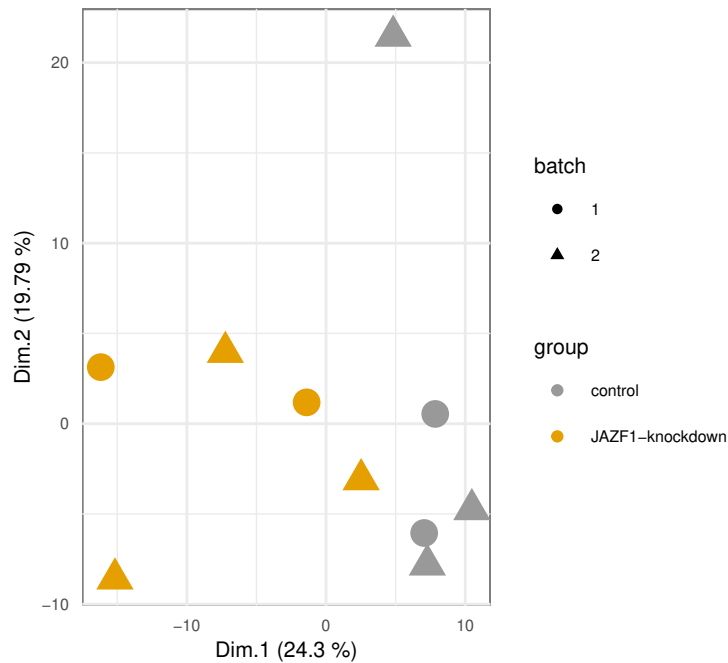

### PCA corrected SVA all surrogate vars: GSE163214

DesignBias=0.46, Gamma=0.33, Dunn1=0.18, WbRatio=0.7

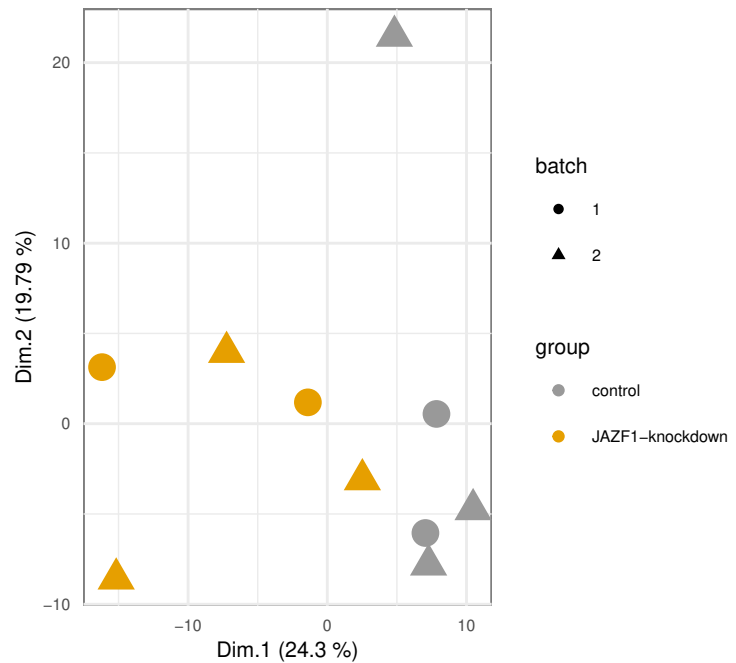

PCA Abundance: GSE163857

DesignBias=0.52, Gamma=0.95, Dunn1=1.17, WbRatio=0.16, DEGs=1726

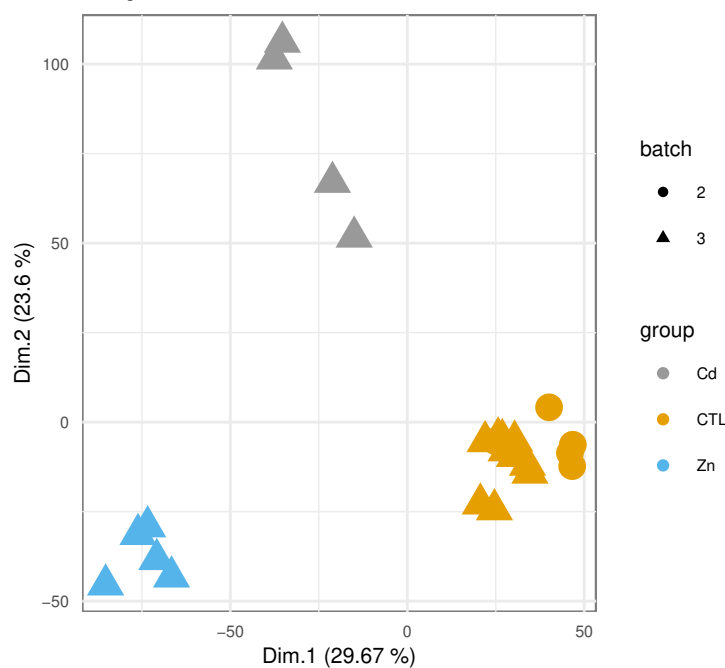

PCA corrected Batch: GSE163857

DesignBias=0.52, Gamma=0.87, Dunn1=0.58, WbRatio=0.25

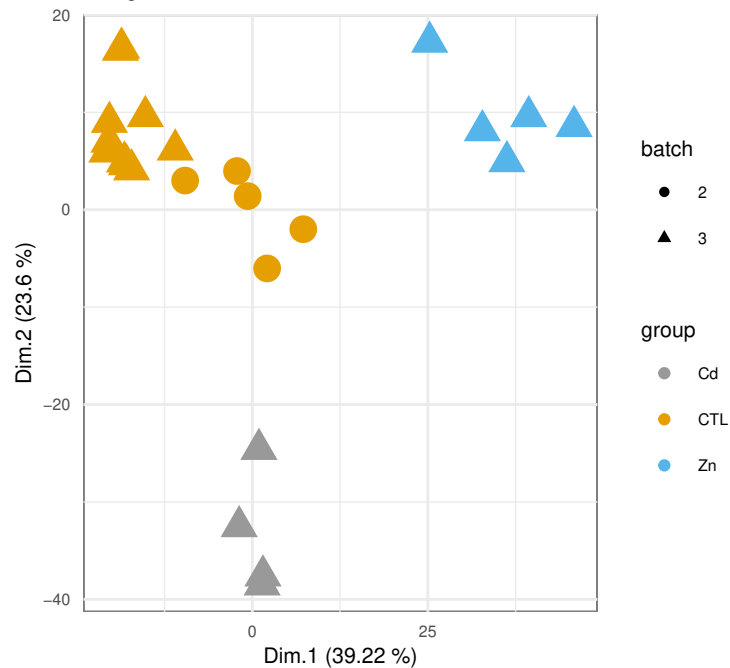

PCA corrected Plow: GSE163857

DesignBias=0.52, Gamma=0.92, Dunn1=1, WbRatio=0.19

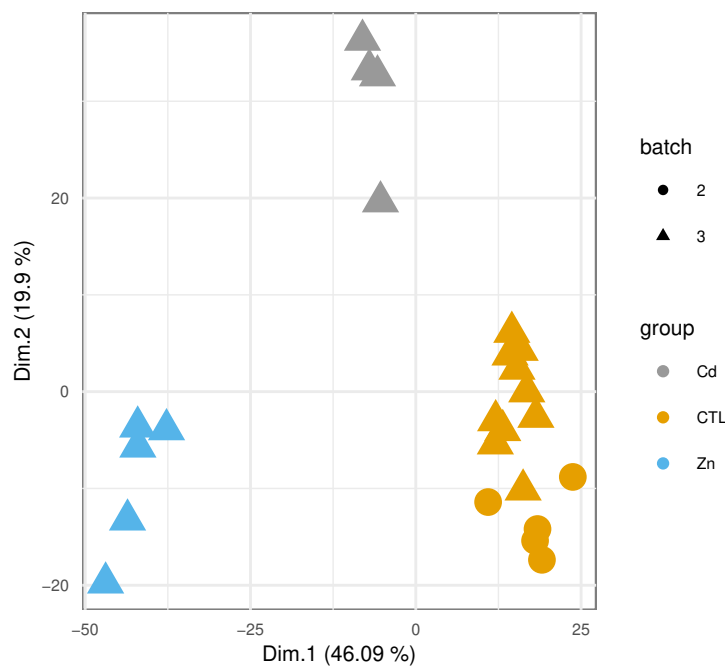

PCA corrected Plow and no outliers: GSE163857

DesignBias=0.52, Gamma=0.82, Dunn1=0.44, WbRatio=0.27

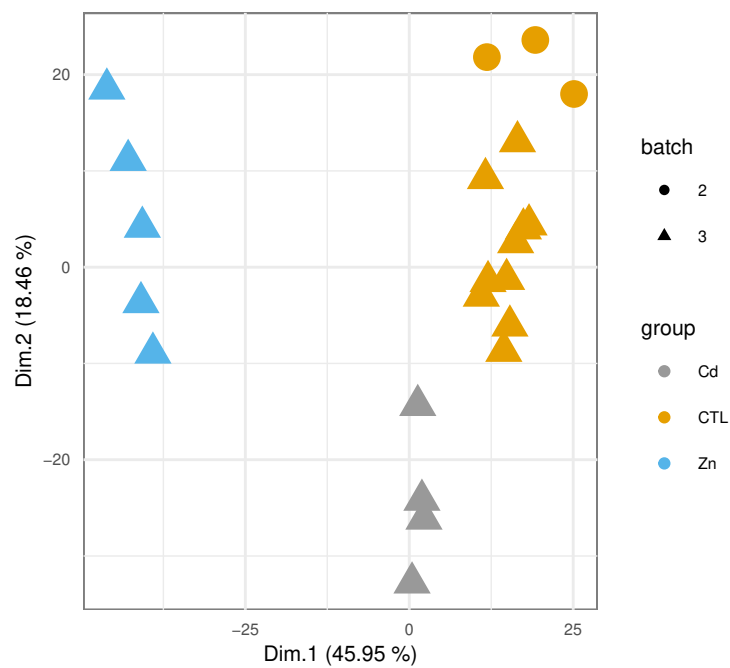

PCA corrected SVA V1: GSE163857

DesignBias=0.52, Gamma=0.96, Dunn1=1.93, WbRatio=0.14

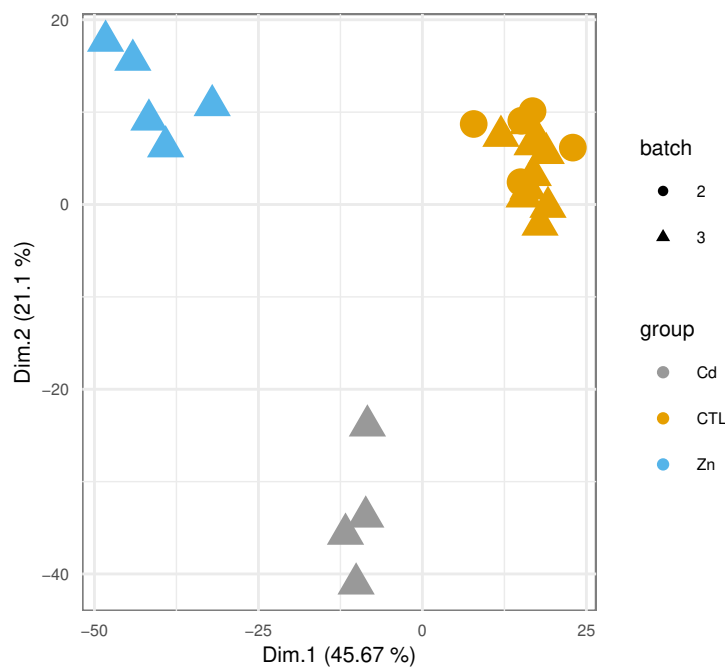

PCA corrected SVA all surrogate vars: GSE163857

DesignBias=0.52, Gamma=0.93, Dunn1=1.28, WbRatio=0.17

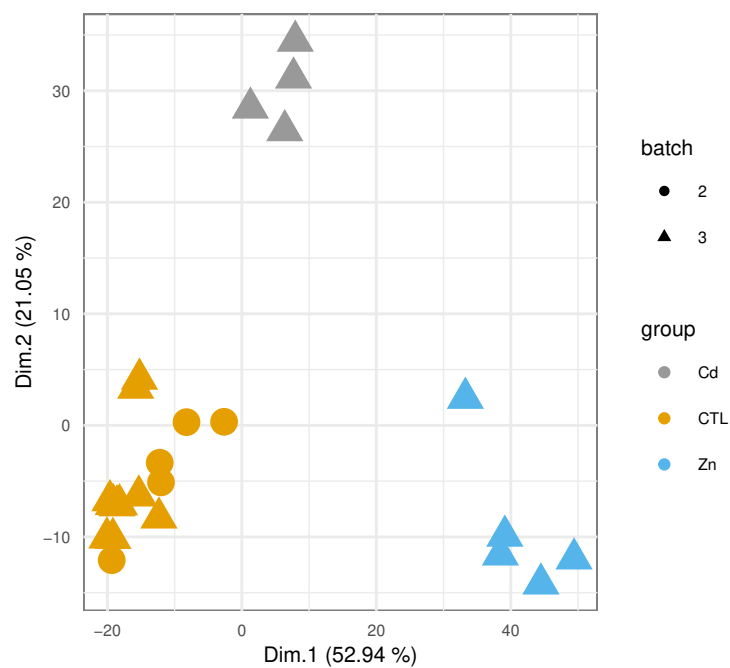

### PCA Abundance: GSE171343

DesignBias=0.49, Gamma=0.01, Dunn1=0, WbRatio=0.99, DEGs=1111

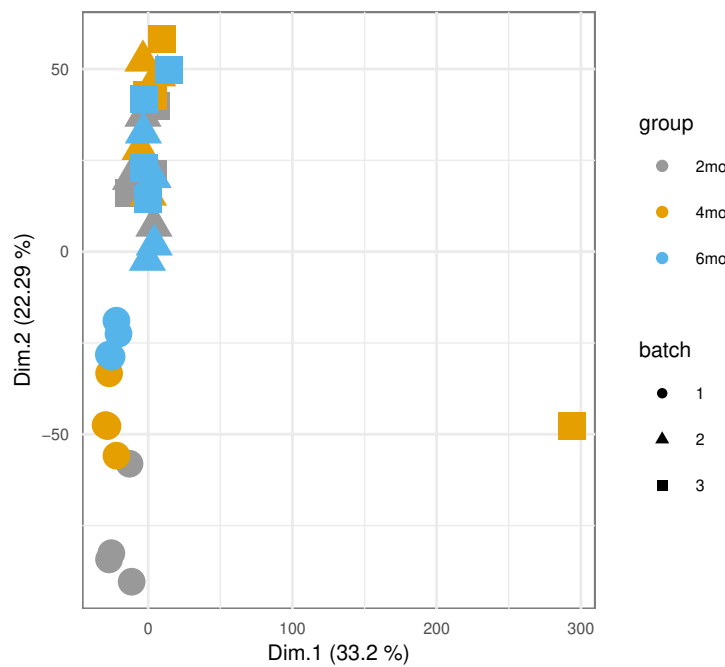

### PCA corrected Batch: GSE171343

DesignBias=0.49, Gamma=0.25, Dunn1=0.02, WbRatio=0.63

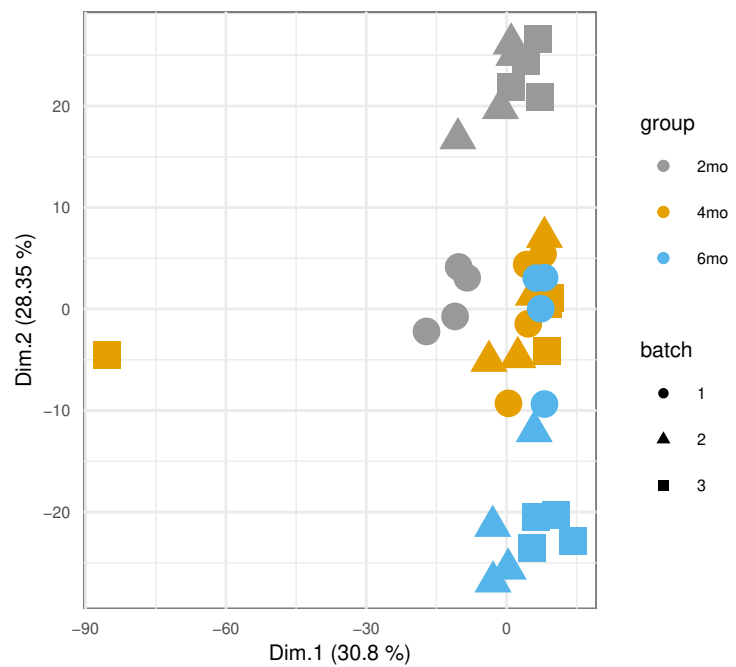

### PCA corrected Plow: GSE171343

DesignBias=0.49, Gamma=0.11, Dunn1=0.01, WbRatio=0.8

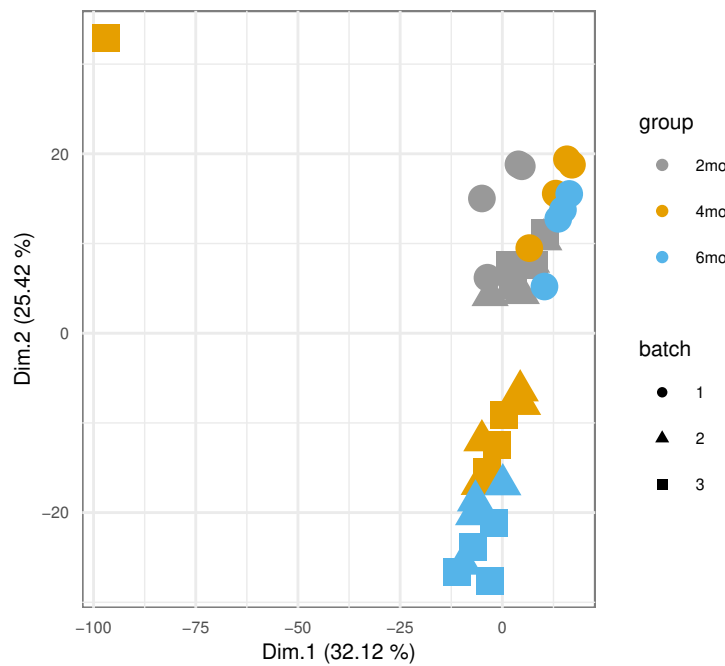

### PCA corrected Plow and no outliers: GSE171343

DesignBias=0.49, Gamma=0.37, Dunn1=0.03, WbRatio=0.64

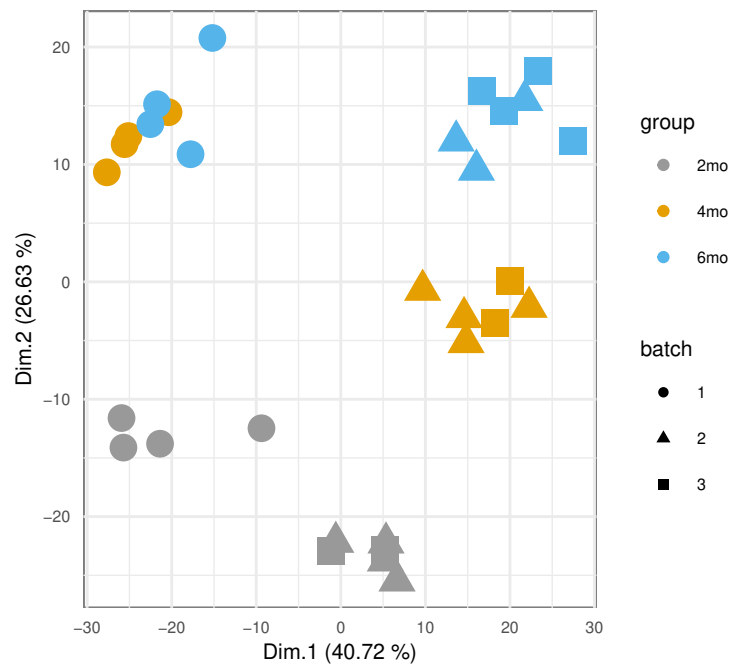

### PCA corrected SVA V1: GSE171343

DesignBias=0.49, Gamma=0.3, Dunn1=0.05, WbRatio=0.71

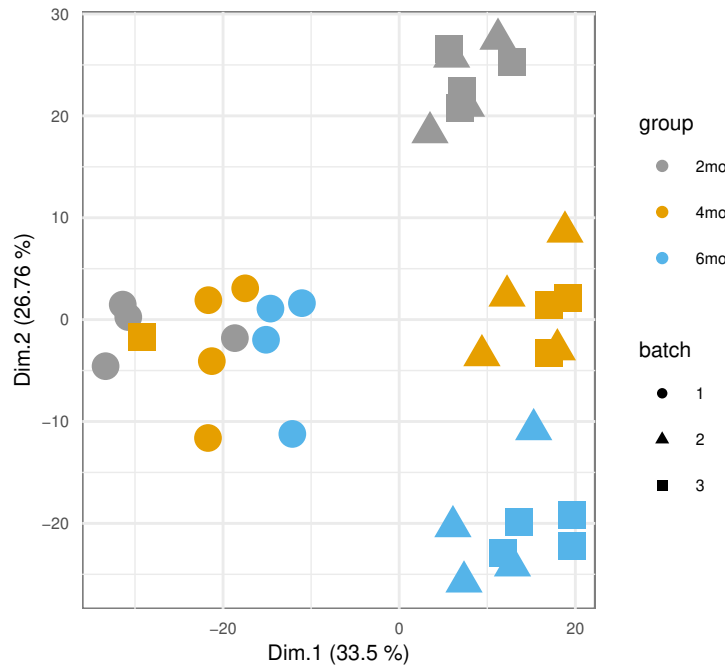

### PCA corrected SVA all surrogate vars: GSE171343

DesignBias=0.49, Gamma=0.64, Dunn1=0.05, WbRatio=0.41

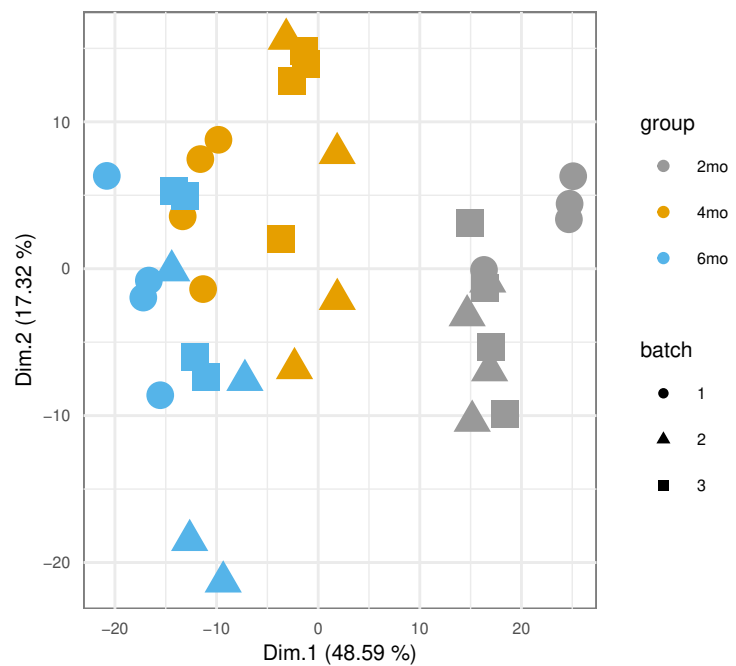

### PCA Abundance: GSE173078

DesignBias=0.48, Gamma=0.01, Dunn1=0.02, WbRatio=0.99, DEGs=100

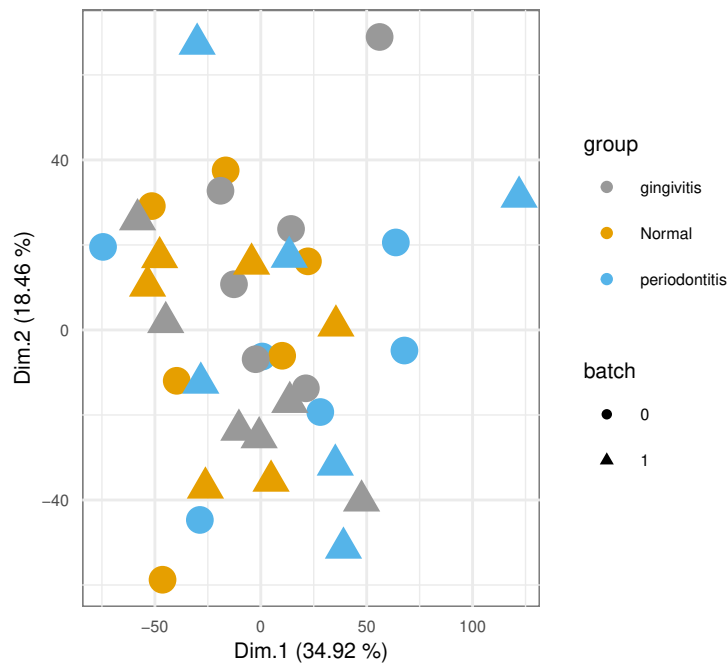

### PCA corrected Batch: GSE173078

DesignBias=0.48, Gamma=0.05, Dunn1=0.01, WbRatio=0.94

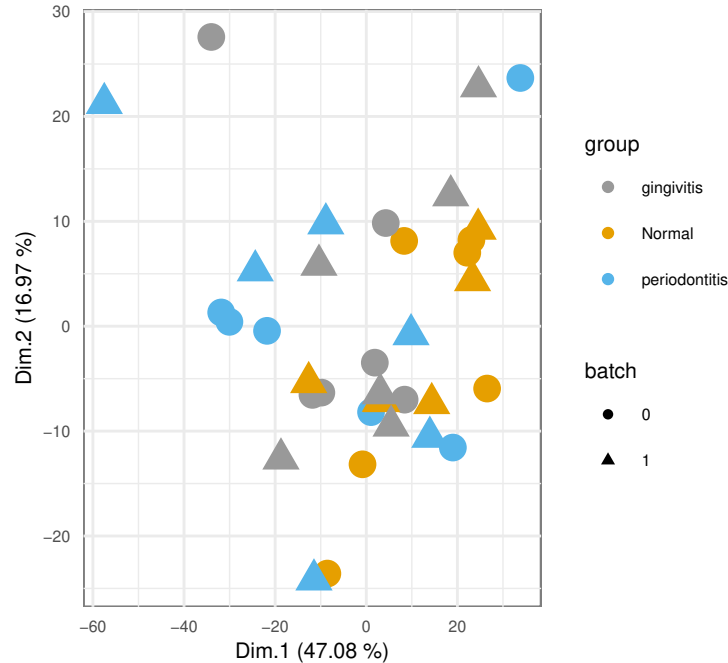

### PCA corrected Plow: GSE173078

DesignBias=0.48, Gamma=0.04, Dunn1=0.01, WbRatio=0.95

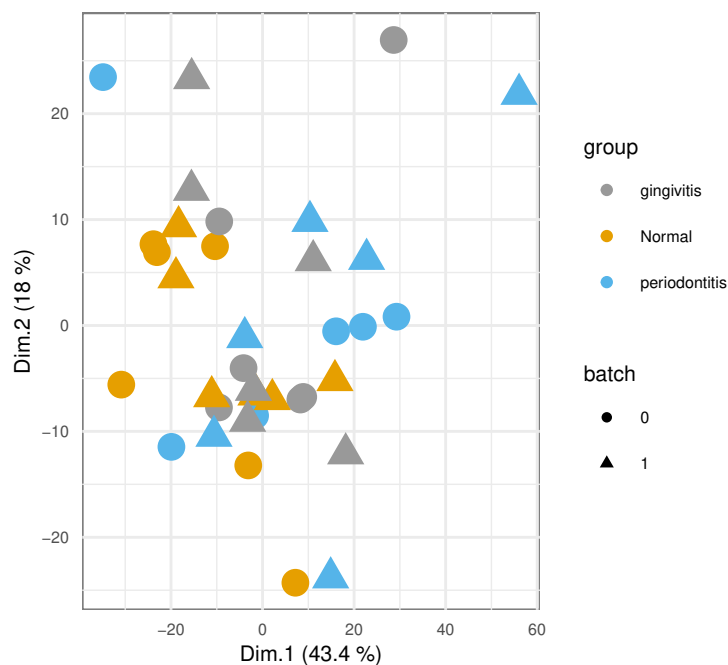

### PCA corrected Plow and no outliers: GSE173078

DesignBias=0.48, Gamma=0.01, Dunn1=0.01, WbRatio=0.99

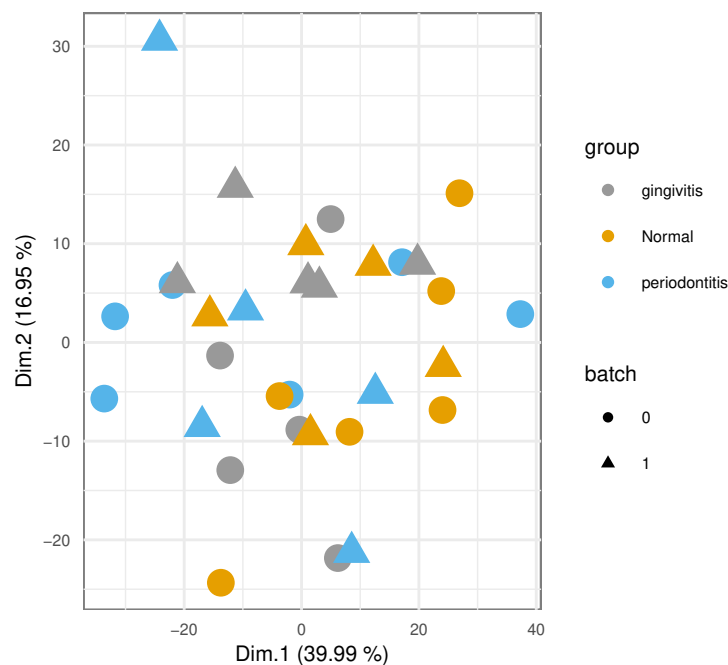

### PCA corrected SVA V1: GSE173078

DesignBias=0.48, Gamma=-0.04, Dunn1=0.04, WbRatio=1.04

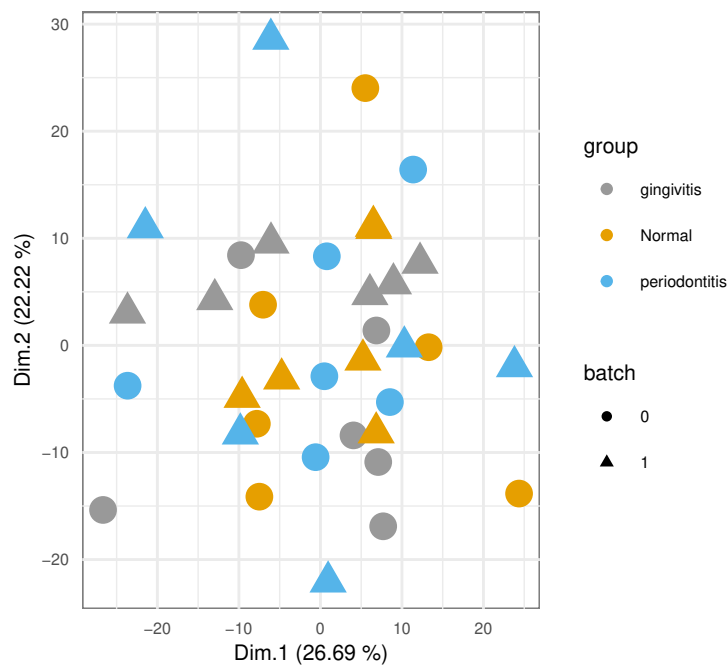

### PCA corrected SVA all surrogate vars: GSE173078

DesignBias=0.48, Gamma=0.05, Dunn1=0.02, WbRatio=0.94

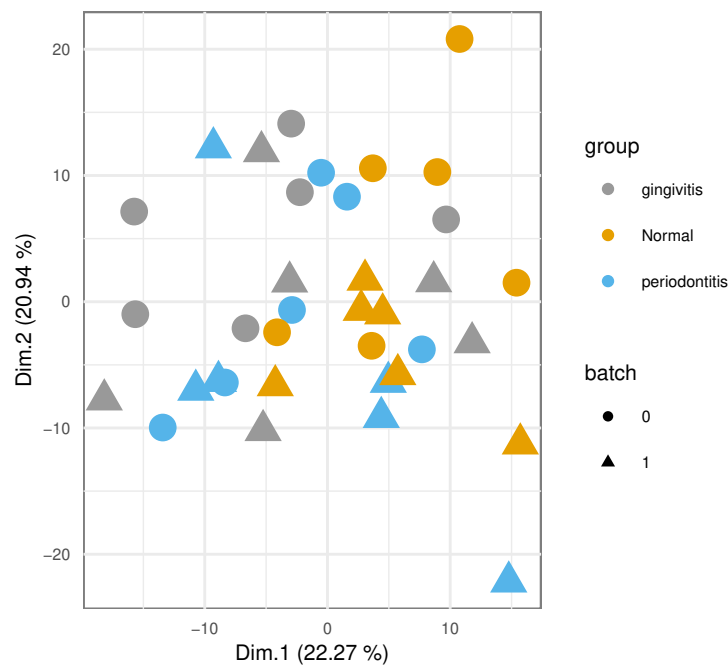

### PCA Abundance: GSE182440

DesignBias=0.49, Gamma=0.03, Dunn1=0.01, WbRatio=0.95, DEGs=3

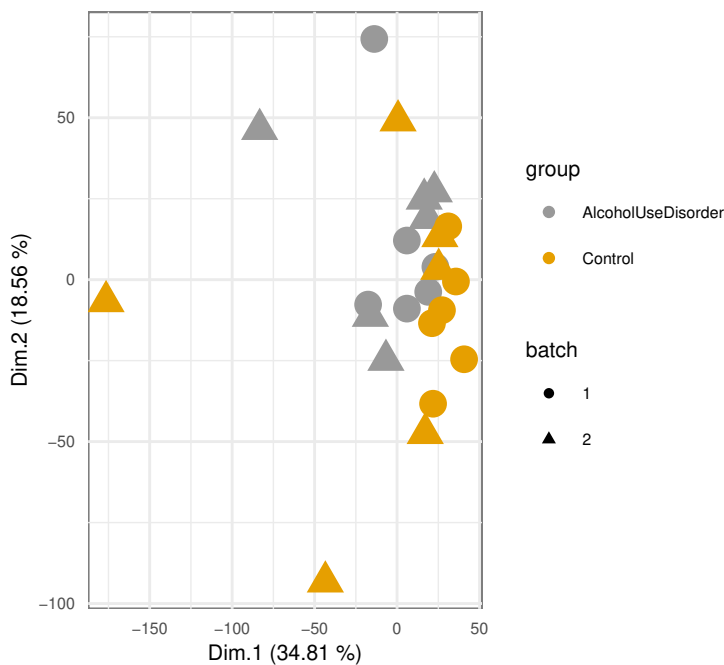

### PCA corrected Batch: GSE182440

DesignBias=0.49, Gamma=0.03, Dunn1=0.01, WbRatio=0.95

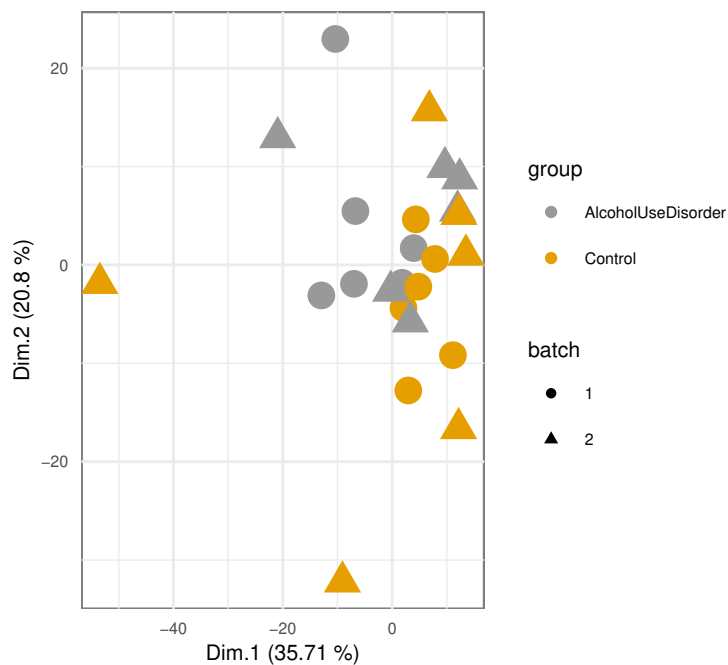

### PCA corrected Plow: GSE182440

DesignBias=0.49, Gamma=0.06, Dunn1=0.04, WbRatio=0.92

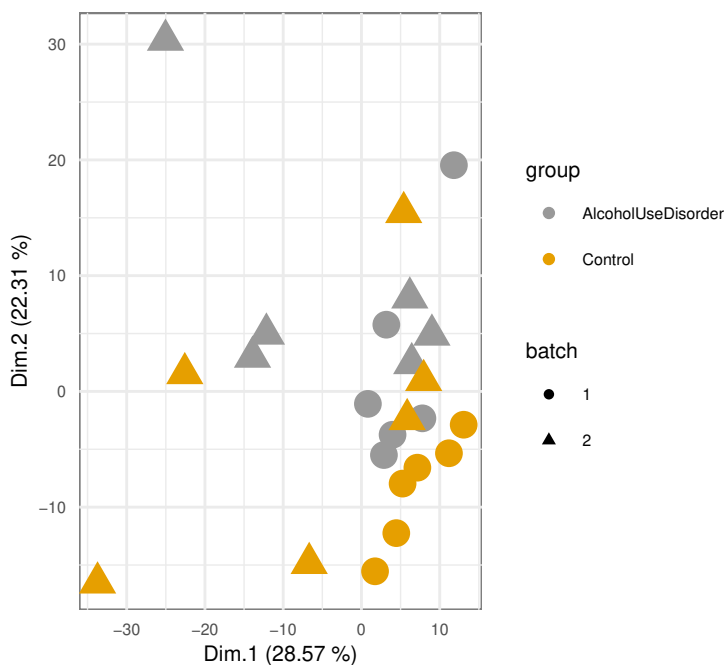

### PCA corrected Plow and no outliers: GSE182440

DesignBias=0.49, Gamma=0.2, Dunn1=0.07, WbRatio=0.78

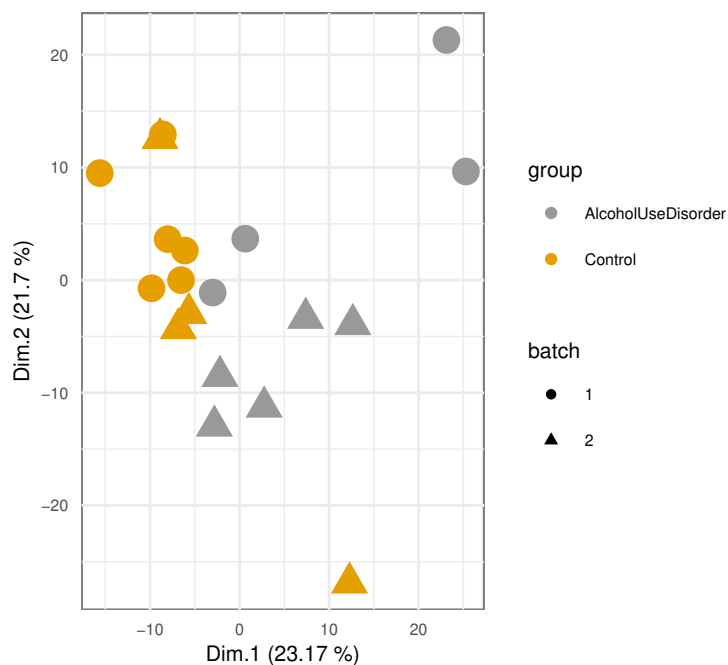

### PCA corrected SVA V1: GSE182440

DesignBias=0.49, Gamma=0.12, Dunn1=0.03, WbRatio=0.86

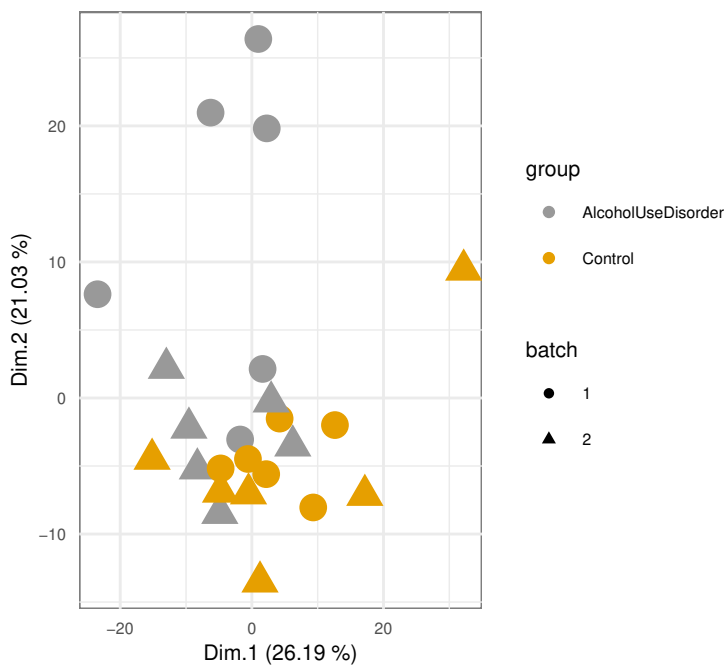

### PCA corrected SVA all surrogate vars: GSE182440

DesignBias=0.49, Gamma=0.04, Dunn1=0.02, WbRatio=0.96

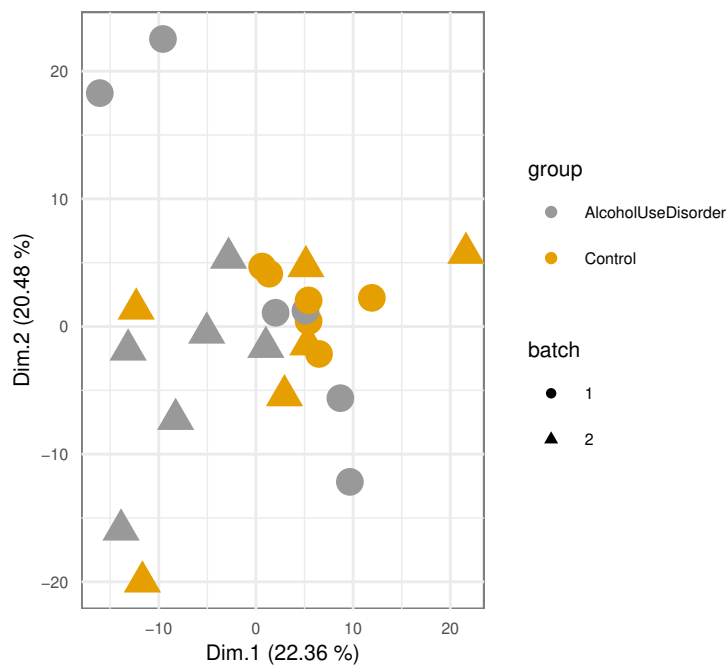

Supplement: 12859_2022_4775_MOESM2_ESM.pdf [file 12859_2022_4775_MOESM2_ESM.pdf]
